1 **Effects of light / dark diel cycles on the photoorganoheterotrophic metabolism of**  
2 ***Rhodopseudomonas palustris* for differential electron allocation to PHAs and H<sub>2</sub>**

3

4 Marta Cerruti<sup>a</sup>, Heleen T. Ouboter<sup>a,\*</sup>, Viktor Chasna<sup>a</sup>, Mark C. M. van Loosdrecht<sup>a</sup>, Cristian  
5 Picioreanu<sup>a</sup>, David G. Weissbrodt<sup>a,#</sup>

6

7 <sup>a</sup> Department of Biotechnology, Delft University of Technology, Delft, The Netherlands

8

9 # Correspondence to: David G. Weissbrodt ([d.g.weissbrodt@tudelft.nl](mailto:d.g.weissbrodt@tudelft.nl))

10

11 \* Present address: Heleen T. Ouboter, Department of Microbiology, Radboud University Nijmegen,  
12 Nijmegen, The Netherlands

13

14 E-mail addresses: [m.cerruti@tudelft.nl](mailto:m.cerruti@tudelft.nl); [h.ouboter@science.ru.nl](mailto:h.ouboter@science.ru.nl); [v.chasna@student.tudelft.nl](mailto:v.chasna@student.tudelft.nl);  
15 [m.c.m.vanloosdrecht@tudelft.nl](mailto:m.c.m.vanloosdrecht@tudelft.nl); [c.picioreanu@tudelft.nl](mailto:c.picioreanu@tudelft.nl); [d.g.weissbrodt@tudelft.nl](mailto:d.g.weissbrodt@tudelft.nl)

16

17 Running title: *Rhodopseudomonas* metabolism under light/dark cycles

18

19 Word counts: Abstract: 250 words; Importance: 150 words; Manuscript: 5060 words

20

## 21 **Abstract**

22 Light/dark cycles can impact the electron distribution in *Rhodopseudomonas palustris*, a  
23 hyperversatile photoorganoheterotrophic purple non-sulfur bacterium (PNSB). Dynamic conditions  
24 during diel cycles are important for the physiology of PNSB, but the coupling between illumination  
25 patterns and redox balancing has not been extensively studied. For survival and growth,  
26 *Rhodopseudomonas* has developed different mechanisms to allocate electrons under dynamic  
27 growth conditions. Products such as hydrogen and poly- $\beta$ -hydroxyalkanoates (PHAs) can form  
28 alternative electron sinks. A continuous culture, fed with a balanced nutrients medium, was exposed  
29 to three different conditions: 24 h continuous infrared illumination, 16h light/8h dark, and 8h  
30 light/16h dark. Light and dark phase durations in a cycle determined the energy availability level  
31 (light) and the attainment of a stationary state. Under long dark phases, the acetate substrate  
32 accumulated to levels that could not be depleted by growth in the light. Under short dark phases,  
33 acetate was rapidly consumed in the light with most of the phototrophic growth occurring under  
34 acetate-limiting conditions. Under diel cycles, substrate uptake and growth were unbalanced and  
35 *Rhodopseudomonas* shunted the excess of carbon and electron flow first toward PHAs production.  
36 Only secondarily, when PHA storage got saturated, the electron excess was redirected toward H<sub>2</sub>. A  
37 numerical model described well the dynamics of biomass and nutrients during the different  
38 light/dark cycle regimes. The model simulations allowed determination of stoichiometric and  
39 kinetic parameters for conversion by *Rhodopseudomonas*. Understanding the inherent process  
40 dynamics of diel light cycles in purple sulfur bacteria cultures would enable optimization  
41 procedures for targeted bioproduct formation.

42

## 43 **Importance**

44 Purple non-sulfur bacteria (PNSB) are important anoxygenic phototrophic microorganisms that take  
45 part in numerous environmental processes, based on their metabolic versatility. *Rhodopseudomonas*

46 *palustris* is a model photosynthetic bacterium of the PNSB guild. Light cycles influence deeply its  
47 physiology. Poly- $\beta$ -hydroxyalkanoates (PHAs) and biohydrogen are two of the most studied  
48 metabolic products of *Rhodospseudomonas*, because of their biotechnology potential besides  
49 involvement in carbon and electron allocations in its metabolism. Their production mechanisms  
50 have often been described as competitive, but the rationale behind the production of one or the other  
51 compound has not been elucidated. Here, we found that under light / dark cycles an excess of  
52 organic substrate was first directed toward PHAs production, and only when this pathway was  
53 saturated H<sub>2</sub> was produced. Understanding the dynamics of carbon and electron allocation under  
54 intermittent light cycles enhances our knowledge on PNSB metabolisms and paves ways to manage  
55 the formation of targeted bioproducts.

56

## 57 **Keywords**

58 *purple non-sulfur bacteria; photoorganoheterotrophy; electron distribution; biohydrogen;*  
59 *polyhydroxyalkanoates; diel cycles; mathematical modeling*

60

## 61 **Introduction**

62 Purple non-sulfur phototrophic bacteria (PNSB) form a guild of hyper-versatile anoxygenic  
63 phototrophs (1), able to grow on different organic and inorganic substrates (2). *Rhodopseudomonas*  
64 *palustris* is one model PNSB (3). It can produce compounds of industrial interest, such as single  
65 cell proteins (4), carotenoids (5), hydrogen gas (H<sub>2</sub>; used as biofuel) and poly-β-hydroxyalkanoates  
66 (PHAs; used as bioplastics) (6,7). Under light and in presence of organic carbon,  
67 *Rhodopseudomonas* grows photoorganoheterotrophically even in absence of external electron  
68 acceptors. Under dark, growth is possible on sugars with external electron acceptors (as  
69 nitrate, trimethylamine-N-oxide or dimethyl sulfoxide) (8,9).

70

71 Light is crucial for phototrophy by providing energy to cells. PNSB capture the photonic energy and  
72 couple the light-driven oxidation of the photopigments to an electron transfer through membrane  
73 bound-enzymes. The trans-membrane gradient of hydrogen protons (H<sup>+</sup>) supports ATP synthesis  
74 through cyclic photophosphorylation (10). NADH is mainly produced during catabolic processes. In  
75 some cases, a reverse electron flow takes places, and the NADH-dehydrogenase catalyze the proton  
76 transfer from the ubiquinone pool to NAD<sup>+</sup>. The control of redox balance is crucial for cell survival  
77 and growth. The ratio between NADH/NAD<sup>+</sup> is important for intracellular redox homeostasis (11).  
78 PNSB generate NADH in three different ways (Figure 1), namely: 1) anabolic processes (12), 2)  
79 light driven reactions through the quinone pool (1); 3) reverse electron transfer (13).

80

81 To cope with possible redox imbalances, mainly arising in anabolic processes, PNSB redistribute  
82 the electrons toward different routes (14). In *Rhodopseudomonas*, the first and most important  
83 electron sink is the biomass itself, that receives the intermediates of the tricarboxylic acid cycle and  
84 the NADPH produced there (15). Secondly, the Calvin-Benson-Bassham (CBB) cycle is  
85 constitutively active also under photoorganoheterotrophy as central recycling mechanism of redox

86 cofactors coming from the anabolic process (15,16). Under photoorganoheterotrophic anaerobic  
87 conditions, a surplus of electrons can be disposed through PHA or H<sub>2</sub> production. Both electron  
88 sinks are normally produced under nitrogen limitation. Nitrogenase-mediated H<sub>2</sub> production has  
89 been extensively described (1). H<sub>2</sub> is a side-product of the nitrogen fixation process, that can only  
90 happen when no preferred nitrogen source like ammonium or glutamate is available (17–19).  
91 Hydrogenase-mediated H<sub>2</sub> production has been reported in presence of an oxidized organic  
92 compound (*i.e.* malate) (21). Several bacterial species accumulate PHAs in the cells as a mean of  
93 carbon and electrons storage under normal conditions (22). In lab-scale experiments, to achieve an  
94 over production, these storage polymers are synthesized when acetyl-CoA and NADPH are in  
95 excess but nutrients like nitrogen, sulfur or phosphorus are limiting (23). Similar to other bacteria,  
96 PNSB can produce PHAs (24) as a mean of carbon and electron balance, utilizing the reducing  
97 power to build the storage polymers (25,26). PHAs production in PNSB occurs under balanced  
98 growth, and it increases under nutrient limitations (27). The two processes of H<sub>2</sub> and PHA  
99 production are considered competitive electron dissipation pathways (28,29). However, the hyper-  
100 versatility of PNSB metabolisms has not enabled to identify an univocal response to redox  
101 imbalances.

102

103 In natural environments, phototrophs are subjected to diel (*i.e.*, 24-h period) light / dark cycles.  
104 Since light is responsible for the production of energy and reducing power, the irradiation patterns  
105 impacts the cellular physiology. The light and dark cycles impact cells redox and ATP balance,  
106 subjecting cells to metabolic switches. How it affects the internal electron allocation patterns and  
107 how PNSB respond to these switches remains puzzling. Allocation of reducing power toward the  
108 aforementioned routes is known, but mechanisms that govern the preferential electron flow have not  
109 been explained.

110

111 Here, we aimed to elucidate the effects of diel light / dark cycles on the physiology and electron  
 112 allocation in *Rhodospseudomonas palustris*, isolated from an in-house PNSB enrichment culture for  
 113 nutrient removal from wastewater (30). The dynamic conditions were hypothesized to influence the  
 114 physiology of purple bacteria, as the energy source is intermittently provided. The process mimics a  
 115 potential natural scenario, where day and night cycles are applied and create a redox imbalance. We  
 116 elucidated the preferential carbon and electron redistribution toward the most important competitive  
 117 pathways of PHAs and H<sub>2</sub> formation during diel light / dark cycles.

118

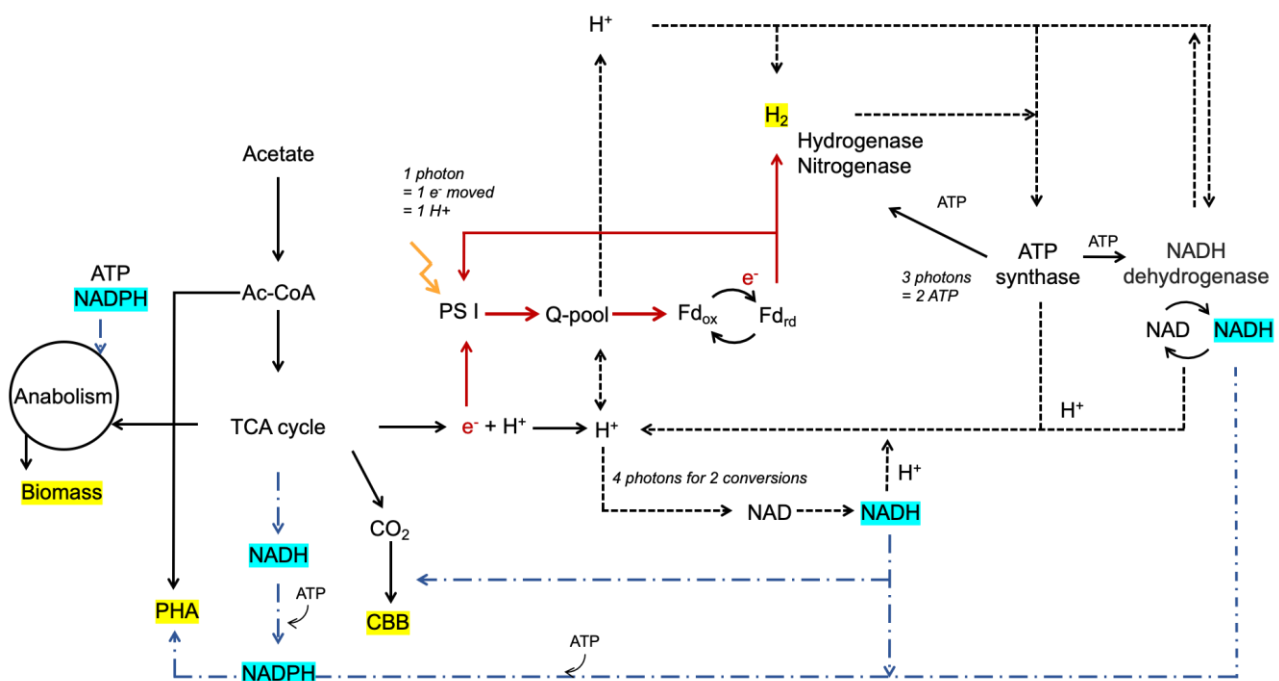

119

120 **Figure 1.** Schematic representation of the reducing power allocation in *Rhodospseudomonas*. Red lines: electron flow;  
 121 Black dashed lines: proton transfer; Blue dotted lines: NADH is normally produced in the catabolic processes, whereas  
 122 NADPH is used in the anabolic processes, such as PHAs formation. Biomass and CBB are the primary electron sinks in  
 123 PNSB. PHAs and H<sub>2</sub> are two of the other possible electron sinks.

124

## 125 **Results**

126 Three regimes for continuous cultivation of *Rhodospseudomonas palustris* were tested: continuous  
127 illumination, cyclic 16 h light / 8 h dark, and cyclic 8 h light / 16 h dark. The biomass and CO<sub>2</sub>  
128 yields ( $Y_{XS}$  and  $Y_{CX}$ ) and the maximum biomass-specific growth rate ( $\mu_{max}$ ) were estimated using  
129 data from the 16 h light / 8 h dark experiment (Table 1). The calibrated model was used to predict  
130 the behavior of the 8 h light / 16 h dark cycles.

131

### 132 **Biomass production of *Rhodospseudomonas palustris***

133 Under continuous illumination, the biomass reached a constant concentration of  $12.10 \pm 0.44$  C-  
134 mmol L<sup>-1</sup>, corresponding to 88% of carbon or 99% of reduction equivalents (COD) provided in the  
135 influent. Around 11% of the carbon present in the inflow was recovered as CO<sub>2</sub> ( $0.112$  C-mmol L<sup>-1</sup>  
136 ) in the off-gas. HPLC results showed no residual acetate in the bulk liquid at steady state.

137

138 Under cyclic operations (Figure 2), the system reached a stable behavior with similar changes in  
139 concentrations during each cycle. Within a cycle a clear dynamic pattern was observed. Under dark,  
140 the biomass did not grow and was only washed-out. The biomass wash-out rate ( $F/V \cdot C_X$ ) was very  
141 well represented by the numerical model (Figure 2A,B). The corresponding change in acetate,  
142 ammonium and phosphate concentrations during the dark phases matched with the expected change  
143 based on the feeding rate. No conversion occurred in the dark.

144

145 Under 16-h light, the biomass accumulation exceeded the dilution rate  $D=F/V$ . An initial growth  
146 rate (assumed to be  $\mu_{max}$ ) of  $0.15$  h<sup>-1</sup> was observed, and reached a steady value ( $\mu = D = 0.04$  h<sup>-1</sup>)  
147 after 2 h exposed to light (Figure 2A). The acetate concentration reached a minimal steady value  
148 when the biomass growth rate achieved the steady state.

149

150 Under shorter 8-h light periods, the biomass growth rate did not reach a stationary-state in a cycle,  
 151 being around  $0.1 \text{ h}^{-1}$ . Acetate was not depleted at the end of the light phase (Figure 2B). The  
 152 biomass increase changed from  $11 \text{ C-mmol L}^{-1}$  on first cycle to  $5 \text{ C-mmol L}^{-1}$  on fourth cycle. The  
 153 growth rate  $\mu$  during the 8 h light period was approximately  $0.12 \text{ h}^{-1}$  thus lower than the  $\mu_{\max}$ . The  
 154 estimated biomass yield on acetate in the light was  $0.88 \text{ C-mol X C-mol}^{-1}$  acetate for both the 16 h  
 155 light and the 8 h light phases, equal to the yield in continuous light regime.

156

157 **Table 1.** Model parameters. The maximum biomass-specific growth rate and yields were fitted to experimental data,  
 158 while the other parameters were measured during experiments, calculated or obtained from literature.

| Parameter name                                                | Symbol        | Value | Units                                                                  | Source     |
|---------------------------------------------------------------|---------------|-------|------------------------------------------------------------------------|------------|
| <b>Max. biomass-specific growth rate</b>                      | $\mu_{\max}$  | 0.15  | $\text{C-mol X} \cdot \text{h}^{-1} \cdot \text{C-mol}^{-1} \text{ X}$ | Fitted     |
| <b>Biomass yield</b>                                          | $Y_{XS}$      | 0.88  | $\text{C-mol X} \cdot \text{C-mol}^{-1} \text{ S}$                     | Fitted     |
| <b>Ammonium yield</b>                                         | $Y_{NX}$      | 0.18  | $\text{mol} \cdot \text{C-mol}^{-1} \text{ X}$                         | Fitted     |
| <b>Phosphate yield</b>                                        | $Y_{PX}$      | 0.009 | $\text{mol} \cdot \text{C-mol}^{-1} \text{ X}$                         | Fitted     |
| <b>CO<sub>2</sub> yield</b>                                   | $Y_{CX}$      | 0.142 | $\text{mol} \cdot \text{C-mol}^{-1} \text{ X}$                         | Fitted     |
| <b>Reactor radius</b>                                         | $R$           | 0.055 | m                                                                      | Measured   |
| <b>Liquid volume</b>                                          | $V$           | 1.2   | L                                                                      | Measured   |
| <b>Liquid flow rate</b>                                       | $F$           | 0.048 | $\text{L} \cdot \text{h}^{-1}$                                         | Measured   |
| <b>Dilution rate</b>                                          | $D$           | 0.04  | $\text{h}^{-1}$                                                        | $F/V$      |
| <b>Gas volume</b>                                             | $V_g$         | 0.3   | L                                                                      | Measured   |
| <b>Gas flow rate</b>                                          | $F_g$         | 7.14  | $\text{L} \cdot \text{h}^{-1}$                                         | Measured   |
| <b>Inflow acetate concentration</b>                           | $C_{S,in}$    | 7     | mM                                                                     | Measured   |
| <b>Inflow ammonium concentration</b>                          | $C_{N,in}$    | 4.28  | mM                                                                     | Measured   |
| <b>Inflow phosphate concentration</b>                         | $C_{P,in}$    | 0.22  | mM                                                                     | Measured   |
| <b>Light intensity at reactor walls</b>                       | $I_0$         | 300   | $\text{W} \cdot \text{m}^{-2}$                                         | Measured   |
| <b>Light extinction coefficient per biomass concentration</b> | $\varepsilon$ | 0.1   | $\text{m}^2 \cdot \text{g}^{-1}$                                       | (17)       |
| <b>Half-saturation coefficient acetate</b>                    | $K_S$         | 0.1   | mM                                                                     | Lower than |



in (36) (0.3 mM)

**Half-saturation coefficient**  $K_N$  0.001 mM (37)

**ammonium**

**Half-saturation coefficient**  $K_P$  0.003 mM (38)

**phosphate**

**Half-saturation coefficient light**  $K_I$  10  $W \cdot m^{-2}$  (39)

**CO<sub>2</sub> mass transfer coefficient**  $k_{La}$  32  $h^{-1}$  Calculated (SI-1)

**Henry coefficient CO<sub>2</sub>**  $H_C$  0.03 (at 30°C)  $mol \cdot L^{-1} \cdot atm^{-1}$  (40)  
0.04 (at 20°C)

159

## 160 **Carbon, nitrogen and phosphorus assimilation**

161 Under continuous illumination, no residual acetate was detected in the bulk liquid. Under 16 h light,  
162 acetate was almost fully depleted, down to a concentration around 1 C-mmol L<sup>-1</sup>, as also very well  
163 represented by the numerical model. Under 8 h light, acetate was still present in the bulk liquid in  
164 concentrations ranging from 4 to 1.5 C-mmol L<sup>-1</sup>. In this case, the model overestimates the rate of  
165 acetate consumption, *i.e.* predicting acetate depletion at the end of the light phase.

166

167 Nitrogen and phosphorus sources were provided in excess, and never became limiting. Under light,  
168 N and P were consumed, resulting in a decrease in their concentrations (Figure 2C,D). Under dark,  
169 the fed N and P accumulated since not assimilated in biomass. At the end of the dark phase,  $3.6 \pm$   
170  $0.6$  N-mmol L<sup>-1</sup> and  $0.14 \pm 0.01$  P-mmol L<sup>-1</sup> remained the bulk liquid. N and P dynamics showed  
171 irregular behaviour under 16 h light (Figure 2C). Therefore, the  $Y_{NX}$  and  $Y_{PX}$  were fitted on the 8 h  
172 light experiment (Figure 2D). The determined yields ( $Y_{NX} = 0.18$ ,  $Y_{PX} = 0.009$ ) were very close to  
173 the theoretical yields resulting from considering the biomass elemental composition ( $Y_{NX} = 0.18$ ,  
174  $Y_{PX} = 0.014$ ) measured in (35). With these yields, the N and P dynamics during the 8 h light cycles  
175 were well represented by the model: accumulation under dark and consumption under light.

176

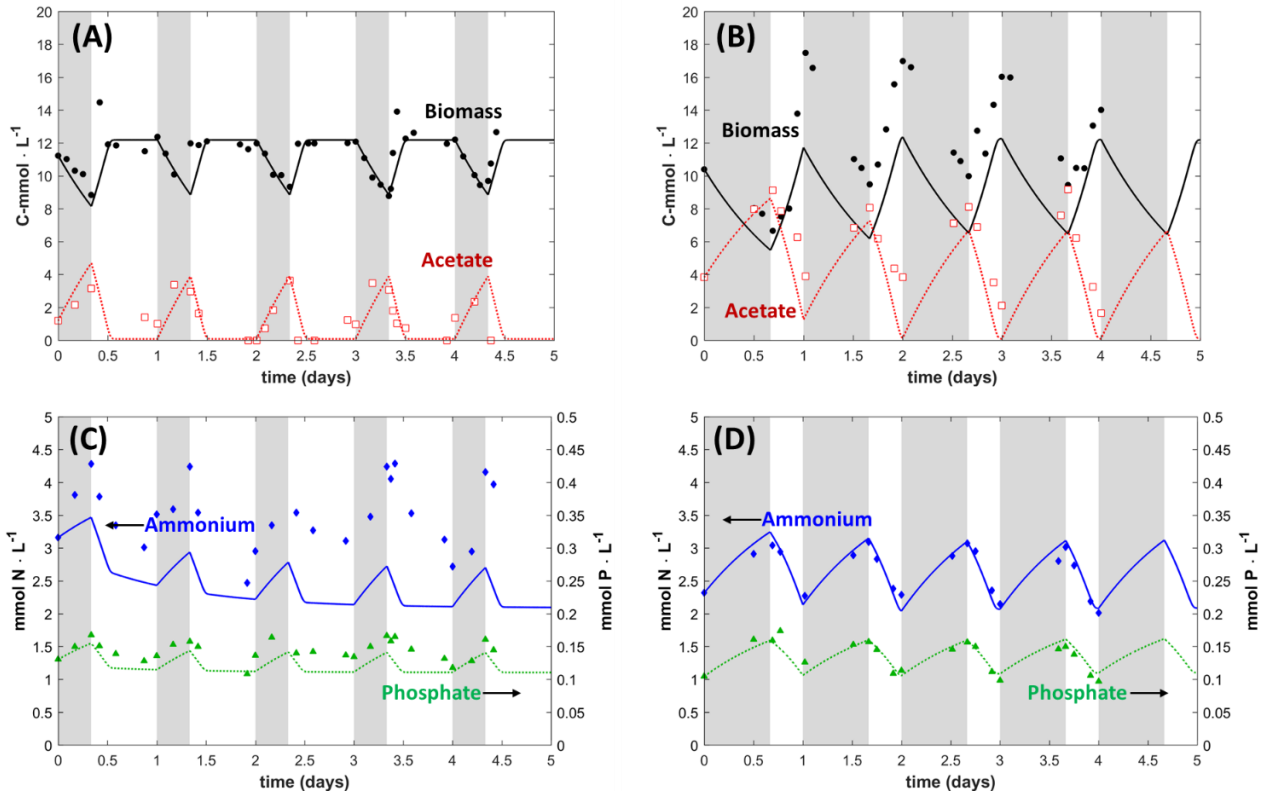

177

178 **Figure 2.** Dynamics of biomass, acetate, ammonium and phosphate concentrations during light-dark cycles: (A),(C) 16  
179 h light / 8 h dark; (B),(D) 8 h light / 16 h dark. Gray areas represent the dark periods. (A),(B) biomass (black circles)  
180 and acetate (red open squares) measured concentrations, with lines being the model results. The biomass concentration  
181 achieved a stationary state, while acetate reached very low (limiting) concentrations after 2 h of the 16 h light periods.  
182 The biomass increased without reaching a steady state during the 8 h light periods, while acetate was not fully  
183 consumed. (C),(D) ammonium (blue diamonds) and phosphate (green triangles) measured concentrations, with lines  
184 being the model results. Concentrations of N and P were not limiting for the system in any illumination phase.

185

## 186 **CO<sub>2</sub> production follows the biomass growth patterns**

187 The CO<sub>2</sub> production rate was constant at  $0.075 \pm 0.001$  mmol h<sup>-1</sup> during continuous illumination  
188 (Figure 3A): the chemostat achieved a stationary operation. Under light/dark cycles, CO<sub>2</sub> emission  
189 in the off-gas decreased in the dark to 0.03 mmol h<sup>-1</sup> (Figure 3B). Possibly, the registered baseline  
190 value can be due to the detection limit of the MS instrument. Under 16 h light, CO<sub>2</sub> emission  
191 increased rapidly within the first hour, reaching 0.25 mmol h<sup>-1</sup>, following the biomass growth rate  
192 with acetate uptake. Once the acetate reached the minimal level, the CO<sub>2</sub> production also decreased

193 to a stable level of  $0.07 \text{ mmol h}^{-1}$  after the second hour of illumination, reflecting the steady state  
194 operation. The numerical model reproduced the observed trends during light phase, but the residual  
195  $\text{CO}_2$  production in the dark phase was not accounted for.

196

197 Under 8 h light / 16 h dar, the  $\text{CO}_2$  production did not achieve a steady state. In the light phase, the  
198  $\text{CO}_2$  production increased with  $0.05$  to  $0.08 \text{ mmol h}^{-1}$  during the cycles, reaching a peak after 4 h  
199 ( $0.88 \pm 0.013 \text{ mmol h}^{-1}$ ), which was described only qualitatively by the model (Figure 3C). The  
200 reason for the discrepancy between model and experimental data is the larger computed acetate  
201 consumption rate, which leads to a higher  $\text{CO}_2$  formation rate in the model results. In both  
202 illumination regimes, the  $\text{CO}_2$  production dropped to the same stable value of  $0.033 \text{ mmol h}^{-1}$   
203 during the dark phase.

204

#### 205 **$\text{H}_2$ is produced only during the short light periods**

206 A very low  $\text{H}_2$  production was recorded during the continuous illumination with rates of around  
207  $0.004 \text{ mmol h}^{-1}$  (Figure 3D). Occasionally, unexplained  $\text{H}_2$  spikes were recorded. During the 16 h  
208 light experiment, dark-phases hydrogen production was negligible and no specific production  
209 pattern was measured in the light (Figure 3E). The very low  $\text{H}_2$  concentration may relate to an  
210 instrumental offset. However,  $\text{H}_2$  was produced constantly during the 8 h light periods (Figure 3F),  
211 with an increase of  $0.02 \pm 0.01 \text{ mmol h}^{-1}$  per cycle and reaching a maximum of  $0.05 \text{ mmol h}^{-1}$ . The  
212 biomass-specific rate of  $\text{H}_2$  production under 8 h light was 10 times higher ( $0.156 \text{ mmol H}_2 \text{ h}^{-1} \text{ g}^{-1}$   
213 DW) than under all other conditions ( $0.014 \text{ mmol H}_2 \text{ h}^{-1} \text{ g}^{-1} \text{ DW}$ ).

214

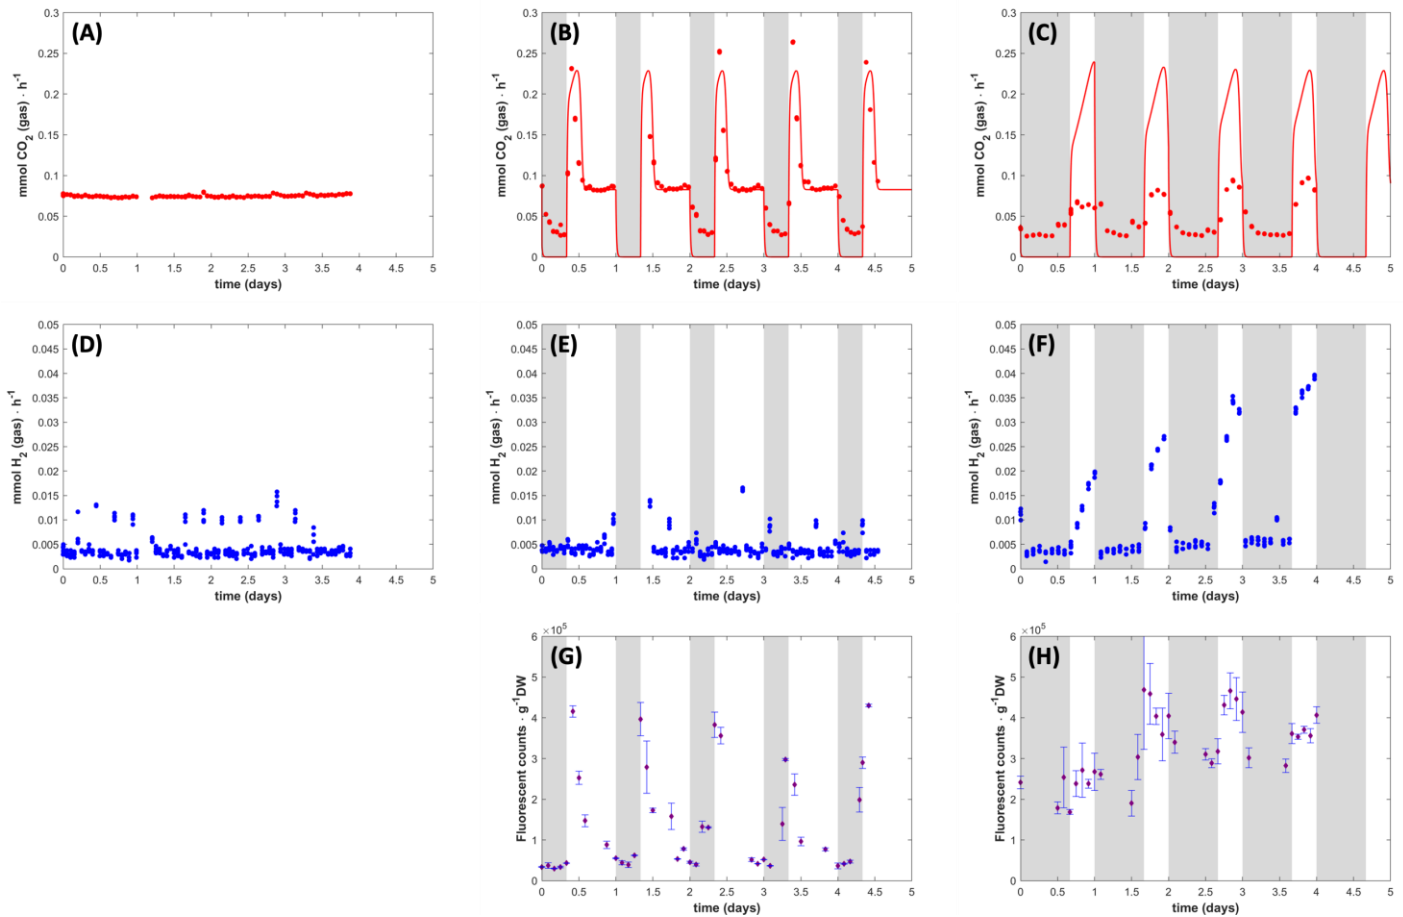

215

216 **Figure 3.** Dynamics of CO<sub>2</sub>, H<sub>2</sub> and PHA during light-dark cycles: (A),(D) continuous illumination; (B),(E),(G) 16 h  
 217 light / 8 h dark; (C),(F),(H) 8 h light / 16 h dark. Gray areas represent the dark periods. (A),(B),(C) CO<sub>2</sub> production rate  
 218 - measured (red circles) and computed (lines). CO<sub>2</sub> production was constant during continuous illumination, but peaks  
 219 appeared during light-dark cycles, correlated with the acetate uptake. (D),(E),(F) measured H<sub>2</sub> production (blue circles).  
 220 Constant low level H<sub>2</sub> was produced during continuous illumination and 16 h light cycles, but H<sub>2</sub> production strongly  
 221 increased in each light period of the 8 h light cycles. (G),(H) PHAs fluorescent counts per gram biomass in the  
 222 light/dark experiments. A PHAs peak was measured at the beginning of each of the 16 h light phases, however less  
 223 clear pattern could be detected under 8 h light.

224

### 225 PHA production follows CO<sub>2</sub> formation under 16 h light but not under 8 h light

226 Due to the low biomass concentration, a traditional PHA extraction and GC quantification (41) was  
 227 not possible. Fluorimetry was used to detect PHAs in the biomass, giving a relative quantification  
 228 (34). PHAs were not detectable under continuous illumination. A fluorescence count peak was  
 229 detectable after 2 h from the light switch in the 16-h light phases ( $3.8 \pm 0.5 \cdot 10^5$  fluorescent counts g<sup>-1</sup>

230 <sup>1</sup> DW) (Figure 3G), concomitantly to the peak of CO<sub>2</sub> production. The PHAs decreased constantly  
231 after the peak, reaching a baseline at  $3 \cdot 10^4$  fluorescent counts g<sup>-1</sup> DW. Under 8 h light / 16 h dark  
232 cycles (Figure 3H), PHA production during light was less pronounced. More PHAs were detectable  
233 in the dark compared to the 16 h light regime. These observations indicate that the diel light regimes  
234 induced PHA formation, with the long light regime generating a typical feast-famine behavior (42),  
235 while the short light regime stimulated a higher PHAs content in the cells.  
236

## 237 Discussion

### 238 Acetate rather than light drives the metabolic responses of *Rhodopseudomonas*

239 Light energy source is central for the catabolic processes in PNSB. Organic substrates are used as  
 240 C-source for biomass synthesis and as electron donors. When no external electron acceptor is  
 241 present, the difference in degree of reduction between substrate and biomass has to be balanced  
 242 with internal electron reallocation processes. The dynamics of the change in N and P concentrations  
 243 were congruent with the biomass formation and their measured yields were close to the elemental  
 244 biomass composition ( $CH_{1.8}O_{0.38}N_{0.18}P_{0.014}$ ) determined in another study (35). Carbon balances  
 245 closed for the continuous illumination experiment and for the 16 h light / 8 h dark experiment, but  
 246 not for the 8 h light / 16 h dark cycles, where the C-balances seemed to indicate a net production  
 247 (Table 2). PHA granules that were always present in the cells under 8 h light / 16 h dark may have  
 248 led to an absorbance overestimation of the biomass present in the reactor.

249

250 **Table 2.** Distribution of the carbon sources and carbon balances under different illumination conditions

| Light/dark regimes | Carbon inputs             |                   | Carbon outputs            |                 |           | Carbon balance (% C) | Electron balance (% COD) |
|--------------------|---------------------------|-------------------|---------------------------|-----------------|-----------|----------------------|--------------------------|
|                    | (C-mmol h <sup>-1</sup> ) |                   | (C-mmol h <sup>-1</sup> ) |                 |           |                      |                          |
| Component          | Acetate                   | Acetate           | Biomass                   | CO <sub>2</sub> | Σ out     |                      |                          |
| Phase              | Influent                  | Effluent          | Effluent                  | Off-gas         |           |                      |                          |
| 24 h light         | 0.66±0.05                 | <LOD <sup>1</sup> | 0.58                      | 0.07±0.001      | 0.65      | 98%                  | 98%                      |
| 16 h light         | 0.66±0.05                 | 0.11±0.01         | 0.57±0.01                 | 0.08±0.01       | 0.75±0.01 | 115±2%               | 113±1%                   |
| 8 h dark           |                           | 0.10±0.02         | 0.51±0.03                 | 0.07±0.02       | 0.68±0.06 | 103±9%               | 102±9%                   |
| 8 h light          | 0.61±0.006                | 0.28±0.03         | 0.62±0.05                 | 0.07±0.01       | 0.97±0.05 | 158±8%*              | 159±9%*                  |
| 16 h dark          |                           | 0.19±0.07         | 0.57±0.12                 | 0.03±0.002      | 0.79±0.15 | 130±25%*             | 137±27%*                 |

251 <sup>1</sup>limit of detection; \* the overvaluation of the carbon and electron balance can be due to an overestimation of the biomass concentration. The  
 252 absorbance measures taken might have influenced by the presence of PHAs inside the cells.

253

254 Light / dark cycles occur daily in natural environments. Phototrophic organisms have adapted to

255 cope with imbalances in energy supply. Purple bacteria have higher biomass production under light  
256 / dark cycles (43,44). H<sub>2</sub> production is increased under discontinuous illumination, following the  
257 biomass trend (45,46).

258

259 Here, the light cycles are important not only for the energy that light provides, but most importantly  
260 for the time available for the cultures to metabolize the nutrients. The light intensity at the surface  
261 of the reactor was 300 W m<sup>-2</sup>. Considering the attenuation due to the biomass concentration and the  
262 reactor depth, the minimum calculated light available was 180 W m<sup>-2</sup> (Figure SI-4). Under any  
263 given condition, the available light intensity was not limiting the microbial metabolism since  
264 always exceeding the half-saturation coefficient for light, defined at  $K_i = 10 \text{ W m}^{-2}$  (39). Purple  
265 bacteria adapt the number and type of photosynthetic unit components based on the different light  
266 intensities (47), but Imam et al. (48) reported that light may be saturating for PNSB growth already  
267 at 100 W m<sup>-2</sup>. We can therefore assume that the irradiance intensity used in our study during the  
268 light periods did not deeply affect the metabolic state of the cells.

269

270 The continuous cultivation system was initially set-up based on the stoichiometric and kinetic  
271 parameters derived from batch experiments. In the continuously illuminated chemostat, the biomass  
272 reached a steady-state, acetate was limiting (i.e., low concentrations), and the biomass growth rate  
273 equaled to the dilution rate (0.04 h<sup>-1</sup>). Once the light/dark cycles were applied, a disturbance of the  
274 steady-state was immediately observed. Under long (16 h) illumination, the biomass consumed the  
275 acetate for growth and after an initial increase of the growth rate the steady-state conditions were  
276 restored for the remaining two thirds of the light cycles (with a specific growth rate again equal to  
277 the dilution rate). Longer (16 h) dark periods led to an increased accumulation of acetate in the bulk  
278 liquid (twice as high as in the 8 h dark), since acetate was fed twice longer and there was no  
279 consumption in the dark. Due to the shorter light (8 h light) periods, acetate was not fully consumed  
280 at the end of the light phases. Therefore, acetate was no more the growth rate limiting compound

281 and the light period was too short to reach a steady state. The growth rate in the light phase  
282 exceeded the value of the imposed dilution rate, leading to a transient accumulation of biomass  
283 (Figure 2B). The modelled biomass dynamics agreed with the measurements, fitting quantitatively  
284 the values for the 16 h light experiment, where the exact steady state values were obtained. When  
285 using the same model parameters for the short (8 h) illumination experiment, the calculated amount  
286 of biomass formed during the light periods corresponded well to the values measured only for the  
287 second and later cycles, while for the first cycle the model underestimated the biomass formed. The  
288 disagreement may be related to the carbon imbalance reported in Table 3. Still, given longer  
289 illumination in the last model cycle would allow the biomass to reach exactly the same steady state  
290 as in the longer light period experiment (Figure SI-3) after about 10 h light and acetate attained the  
291 minimum.

292

293 The average acetate consumption rates under 16 h light were  $0.08 \text{ C-mol h}^{-1} \text{ L}^{-1}$  (Figure SI-5) and  
294 under 8 h light were  $0.15 \text{ C-mol h}^{-1} \text{ L}^{-1}$  (Figure SI-6). Initially, the biomass grew at the maximum  
295 substrate uptake rate. If the light phase was too short (as in the 8 h light periods), acetate was not  
296 fully consumed ( $2.5 \pm 1.1 \text{ C-mmol L}^{-1}$ ) and the biomass grew at its maximum growth rate.

297

### 298 **PHA synthesis patterns reflect the metabolic state of the cells**

299 PHAs can be formed under dynamic conditions or because of imbalance in the degree of reduction  
300 between biomass and carbon source. PHAs constitute carbon and energy stocks (49,50). In  
301 chemostat conditions, carbon was continuously fed to the cultures and cells did not store PHAs.  
302 PHA synthesis in purple bacteria has primarily been reported under nitrogen limitation, as an  
303 intrinsic mechanism for the redistribution of carbon excess. PHA accumulation is conventionally  
304 reported under growth-limiting conditions (51,52) when the carbon sources are available, but the  
305 nutrients (such as N, P or S) to produce cellular components are limited resulting in acetyl-CoA  
306 accumulation in the cells.



307

308 During the anabolic reactions, *Rhodospseudomonas* incorporates acetate in the form of acetyl-CoA  
309 and releases at the same time CoA. In highly active cells, the levels of acetyl-CoA are low, but the  
310 levels of CoA are high. In contrast, in non-growing cells, acetyl-CoA is not utilized in anabolic  
311 processes and accumulates in the cells (53). A high acetyl-CoA to CoA ratio and the presence of  
312 NADPH are required for the initiation of the PHA pathway (54).

313

314 The ratio between carbon sources and other nutrients is important to maintain the balance between  
315 substrate uptake rate and growth rate. The inflow was defined based on the biomass composition of  
316 purple bacteria (38), with a C:N ratio of 5.68:1 mol/mol was used in the medium. Nitrogen was  
317 provided in excess preventing N-limitation imbalance. Consequently, under continuous  
318 illumination, no production of PHAs was detected.

319

320 After a period of darkness, the biomass was subjected to an excess of light and nutrients (acetate,  
321 ammonium, phosphate) resulting in an increased substrate uptake rate. For the first 2 h after  
322 switching on the 16-h light phase, the growth rate was close to the previously measured maximal  
323 growth rate  $\mu_{\max}$  of  $0.15 \text{ h}^{-1}$ . After 3 h, when acetate was no more in excess, the growth rate  
324 stabilized again at the dilution rate value of  $0.04 \text{ h}^{-1}$ . When shorter (8 h) light periods were applied,  
325 the initial growth rate was  $\sim 0.1 \text{ h}^{-1}$ . Under both conditions, cells exhibited growth rates close to  
326  $\mu_{\max}$ . This resulted in the production of reducing power, which, along with the NADH produced in  
327 the photosynthetic processes, became in excess and had to be reallocated. As reported by Kanno et  
328 al. (55), the photosynthetic units are not disassembled in the dark, even under starvation. These are  
329 readily available, once the light conditions are restored, to produce ATP and NADH for the  
330 biosynthetic processes. This, linked to the prompt availability of the enzymes for PHAs formation  
331 that are constitutively expressed (56), leads to the immediate production of PHAs. Under 16 h light,  
332 a peak of fluorescent counts was observed 2 h after the light switch, but it decreased to baseline

333 levels (steady state) once the growth rate stabilized again at  $0.04 \text{ h}^{-1}$ . The fluorescent counts  
334 decreased and no  $\text{H}_2$  production was observed. Cells reached a maximal capacity of substrate  
335 uptake, though not coupled to a maximal growth rate, similarly to what is described in (57).

336

337 Under 8 h light / 16 h dark cycles, acetate was not completely consumed during illumination and  
338 increasingly accumulated during the dark phases, resulting in a further imbalance in the redox state  
339 of the cells. The redox imbalance generated by the continuous presence of acetate, rather than the  
340 illumination conditions alone, led to a more constant production of PHAs. The cells were highly  
341 active, with a growth rate close to the maximal growth rate, leading to a low availability of CoA  
342 that resulted in PHAs formation. Only when the PHAs pool got saturated the NADPH pool was  
343 further increased, and  $\text{H}_2$  production became possible.

344

#### 345 **$\text{H}_2$ production is a secondary pathway of electron dissipation**

346 The  $\text{H}_2$  production rates here reported are low compared to other studies that have exposed PNSB to  
347 similar light intensities (48). However, our experimental conditions were not designed to stimulate  
348  $\text{H}_2$  production.  $\text{H}_2$  can be produced either via the nitrogenase system, either via the ferredoxin-  
349 hydrogenase system. Ammonium is known to inhibit  $\text{N}_2$  fixation in photosynthetic bacteria. It also  
350 effectively prevents photoproduction of  $\text{H}_2$ , due to inhibition and inactivation of nitrogenase (18).  
351 The presence of ammonium in non-limiting amounts in the medium indicated that potentially  $\text{H}_2$   
352 production was driven by the hydrogenase rather than by the nitrogenase. The molar C:N ratio (5.7)  
353 was 7 times lower than in most other studies on  $\text{H}_2$  production (average C:N ratio 40) (58).  
354 Nonetheless, the  $\text{H}_2$  production rate per gram biomass during the 8 h light phases was around 11  
355 times higher than in all other conditions ( $0.156 \text{ vs } 0.014 \text{ mmol h}^{-1} \text{ g}^{-1} \text{ DW}$ ), indicating that  $\text{H}_2$   
356 production acts as further electron dissipation pathway. A similar  $\text{H}_2$  production pattern under  
357 alternate irradiation in PNSB cultures has been found (59), with  $\text{H}_2$  production only during the light  
358 phases.  $\text{H}_2$  production was not integrated in the numerical model, since  $\text{H}_2$  did not contribute

359 significantly to the stoichiometric balance and kinetics.

360

361 The absence of relevant H<sub>2</sub> production over 16 h light ( $0.004 \pm 0.0004$  mmol h<sup>-1</sup>) and its low but  
362 constant production during 8 h light ( $0.025 \pm 0.009$  mmol h<sup>-1</sup>) indicates that the H<sub>2</sub> sink did not play  
363 a major role in the electron redistribution patterns.

364

365 Overall, PNSB are one of the most versatile guilds of microorganisms. They present consistent  
366 differences in their metabolisms, interspecies and intraspecies. We presented a comprehensive  
367 explanation of the underlying mechanisms of electron allocation using quantitative biotechnology  
368 and metabolic modelling. The numerical model represented well the biomass and nutrient dynamics  
369 during the light/dark cycles of different durations. It allowed for determining stoichiometric and  
370 kinetic parameters of the *Rhodospseudomonas*. It can be concluded that:

- 371 1) Under light-saturating conditions and continuous-flow reactor regime, durations of light and  
372 dark phases in a diel cycle set the availability of substrate and the achievement of a steady  
373 state. Longer dark phases result in an excess of substrate available in the light phase for  
374 biomass growth. Longer light phases lead to substrate limitation and steady conditions.
- 375 2) Even in actively growing cells, carbon allocation is in place, namely toward PHA  
376 production.
- 377 3) In growing cells, H<sub>2</sub> production during illumination is a minor electron sink and secondary  
378 to PHA production.

379

## 380 **Material and Methods**

### 381 **Strain**

382 The *Rhodopseudomonas* strain was isolated with dilution series in agar from an in-house PNSB  
383 enrichment culture designed for nutrient removal from synthetic wastewater (30). The isolate was  
384 characterized by full-length 16S rRNA gene sequencing. The genomic DNA was extracted using  
385 UltraClean® Microbial DNA Isolation Kit (MO BIO Laboratories, Inc., USA), following  
386 manufacturer's instructions. The full 16S rRNA gene was amplified with the primers forward U515  
387 (5'-GTGYCAGCMGCCGCGGTA-3') and reverse U1071 (5'-GARCTGRCGRCRRCCATGCA-  
388 3') (31), and sequenced for phylogenetic identification using a Sanger sequencing (Baseclear, NL).  
389 The sequence was aligned over the Blast database (32), and resulted in a 97.2% identity with  
390 *Rhodopseudomonas palustris*.

391

### 392 **Medium**

393 The inflow medium was adapted from Cerruti et al. (30). It consisted of (per liter): 0.914 g  
394 CH<sub>3</sub>COONa·3H<sub>2</sub>O (13.5 C-mmol L<sup>-1</sup> or 54 mmol electrons L<sup>-1</sup> when expressed via degree of  
395 reduction and 432 mg COD L<sup>-1</sup> when expressed as chemical oxygen demand), 0.229 g NH<sub>4</sub>Cl (*i.e.*,  
396 4.281 mmol N L<sup>-1</sup> or 60 mg N-NH<sub>4</sub><sup>+</sup> L<sup>-1</sup>), 0.014 g KH<sub>2</sub>PO<sub>4</sub> and 0.021 g K<sub>2</sub>HPO<sub>4</sub> (*i.e.*, 0.223 mmol P  
397 L<sup>-1</sup> or 7 mg P L<sup>-1</sup>), 0.200 g MgSO<sub>4</sub>·7H<sub>2</sub>O, 0.200 g NaCl, 0.050 g CaCl<sub>2</sub>·2H<sub>2</sub>O, 1 mL vitamins  
398 solution, 1 mL trace element solution, and 4.7 g 4-(2-hydroxyethyl)-1-piperazineethanesulfonic acid  
399 (HEPES) used as pH buffer.

400

401 The vitamin solution was composed of (per liter): 200 mg thiamine-HCl, 500 mg niacin, 300 mg p-  
402 amino-benzoic acid, 100 mg pyridoxine-HCl, 50 mg biotin and 50 mg vitamin B12.

403 The trace element solution was composed of (per liter): 1100 mg Na EDTA·2H<sub>2</sub>O, 2000 mg  
404 FeCl<sub>3</sub>·6H<sub>2</sub>O, 100 mg ZnCl<sub>2</sub>, 64 mg MnSO<sub>4</sub>·H<sub>2</sub>O, 100 mg H<sub>3</sub>BO<sub>3</sub>, 100 mg CoCl<sub>2</sub>·6H<sub>2</sub>O, 24 mg  
405 Na<sub>2</sub>MoO<sub>4</sub>·2H<sub>2</sub>O, 16 mg CuSO<sub>4</sub>·5H<sub>2</sub>O, 10 mg NiCl<sub>2</sub>·6H<sub>2</sub>O and 5 mg NaSeO<sub>3</sub>.

406

407 The medium components were sterilized though autoclavation or filtration with 0.22 µm filters  
408 (Whatman, USA) (acetate solution, trace elements and vitamins).

409

#### 410 **Reactor setup**

411 Continuous cultures were run to evaluate the influence of diel cycles on the physiology of PNSB. A  
412 1.5-L continuous-flow stirred-tank reactor with 1.2-L working volume was connected to a  
413 programmable logic controller (In-Control and Power unit, Applikon, NL) and operated under  
414 stirring of 350 rpm, pH 7.0 ± 0.5, temperature of 30±1 °C during illumination phases and 20°C  
415 during dark phases. Argon gas (Linde, NL, >99% purity) was sparged continuously in the bulk  
416 liquid phase at 120 mL min<sup>-1</sup> to maintain anaerobic conditions. The continuous-flow rate was set at  
417 0.048 L h<sup>-1</sup>. It corresponded to a dilution rate of 0.04 h<sup>-1</sup> chosen based on the growth rate of the  
418 strain previously measured at 0.11 h<sup>-1</sup> (data not shown). The biomass was maintained at a low  
419 concentration of 0.26 ± 0.05 g DW L<sup>-1</sup> to minimize light shading effects.

420

421 The reactor was placed in a shaded hood to tightly control the irradiation patterns. Two halogen  
422 floodlight lamps (Handson, NL) were positioned at opposite sides of the reactor diameter. The  
423 incident white light spectrum was filtered for infrared (IR) light ( $\lambda > 700$  nm) using two filter sheets  
424 of 70 x 70 cm (Black Perspex 962, Plasticstockist, UK). The IR light intensity measured at the  
425 reactor surface with a pyranometer (CMP3; Kipp & Zonen, NL) was 300 W m<sup>-2</sup>. An automatic  
426 device was used to switch on/off the light at required time sets. Three light conditions were tested:  
427 1) continuous illumination (*i.e.*, 24 h light), 2) 16 h light and 8 h dark cycles, and 3) 8 h light and 16  
428 h dark cycles.

429

## 430 **Analytical methods**

431 The biomass concentration was measured by absorbance at 660 nm ( $A_{660}$ ) using a  
432 spectrophotometer (Biochrom, Libra S11, USA). A calibration curve was established to correlate  
433  $A_{660}$  to dry weight (DW) concentration:  $c(\text{g DW L}^{-1}) = 0.64 A_{660} - 0.06$ . Biomass dry weight was  
434 measured taking samples from the liquid phase, filtering them using 0.45  $\mu\text{m}$  filters (Whatman,  
435 USA) and storing them in a 70 °C stove for 72 h (adapted from Lip et al. 2020).

436

437 Acetate was measured with a high-performance liquid chromatograph (HPLC) (Waters, 2707, NL)  
438 equipped with an Aminex HPX-87H column (BioRad, USA). Samples were eluted using  $\text{H}_3\text{PO}_4$   
439 ( $1.5 \text{ mmol L}^{-1}$ , flowrate of  $0.6 \text{ mL min}^{-1}$ , temperature of  $60^\circ\text{C}$ ) prior to refraction index (Waters  
440 2414) and UV (210 nm, Waters 484) detections.

441

442 Ammonium (as  $\text{N-NH}_4^+$ ) and orthophosphate (as  $\text{P-PO}_4^{3-}$ ) concentrations were measured with a  
443 discrete analyser (Thermoscientific Gallery, NL).

444

445 PHA measurements were performed with fluorimetry for high sensitivity on small biomass samples.  
446 The low biomass concentration did not allow for traditional extractions of PHA and gas  
447 chromatographic measurements of monomers. PHAs were stained in the biological samples with  
448 Nile red (CAS n. 7385-67-3, Sigma Aldrich), as in (34). Fluorescence was measured with a  
449 microplate reader (1000M pro, Tecan), with excitation at 535 nm and emission at 605 nm. The  
450 fluorescent counts were normalized by the g DW of biomass present in analysed samples. The  
451 absorbance at 660 nm was measured in each well, and then converted in gDW biomass, to this end.

452

453 The CO<sub>2</sub> and H<sub>2</sub> in the offgas were measured using a mass spectrometer (Thermofisher, Prima BT  
 454 Benchtop MS) connected online to the bioreactor. The production rates of these components were  
 455 calculated using the argon gas inflow rate (120 mL h<sup>-1</sup>).

456

### 457 **Mathematical model**

458 A simple mathematical model was developed to characterize the behavior of the continuous culture  
 459 of *Rhodospseudomonas* exposed to light/dark cycles. Under light, photoorganoheterotrophic growth  
 460 was assumed; under dark, completely ceased metabolic activity. The growth stoichiometry with  
 461 light as energy source followed equation (1), with the biomass composition adapted from (35):

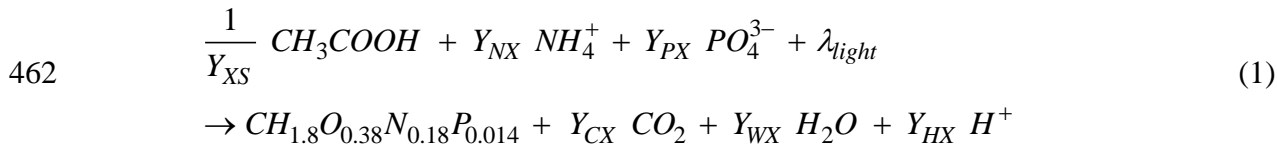

463

464 The process was described by a system of balance equations for the relevant materials in the mixed  
 465 liquor (eqns. (2) (biomass  $C_X$ , acetic acid  $C_S$ , ammonium  $C_N$ , phosphate  $C_P$  and carbon dioxide  $C_C$ ).

$$466 \quad \frac{dC_X}{dt} = \frac{F}{V} \cdot (-C_X) + r_X, \quad \frac{dC_C}{dt} = \frac{F}{V} \cdot (-C_C) + r_C + k_L a \cdot (C_C^* - C_C) \quad (2)$$

$$467 \quad \frac{dC_S}{dt} = \frac{F}{V} \cdot (C_{S,in} - C_S) + r_S, \quad \frac{dC_N}{dt} = \frac{F}{V} \cdot (C_{N,in} - C_N) + r_N, \quad \frac{dC_P}{dt} = \frac{F}{V} \cdot (C_{P,in} - C_P) + r_P$$

468

469 A gas phase balance was integrated for the CO<sub>2</sub> concentration in the gas  $C_{C,g}$  (mmol/L):

$$470 \quad \frac{dC_{C,g}}{dt} = -\frac{F_g}{V_g} C_{C,g} - k_L a \cdot (C_C^* - C_C) \cdot \frac{V}{V_g} \quad (3)$$

471

472 The volumetric growth rate,  $r_X$  (C-mmol X L<sup>-1</sup> h<sup>-1</sup>), was assumed to be limited by the  
 473 concentrations of multiple chemical compounds and by light intensity  $I$  (W m<sup>-2</sup>):

474 
$$r_X = \mu_{max} \cdot \frac{C_S}{K_S + C_S} \cdot \frac{C_N}{K_N + C_N} \cdot \frac{C_P}{K_P + C_P} \cdot \frac{I}{K_I + I} \cdot C_X \quad (4)$$

475

476 The uptake and production rates of chemical compounds ( $\text{mmol L}^{-1} \text{h}^{-1}$ ) follow from the reaction  
477 stoichiometry and biomass growth rate:

478 
$$r_S = -\frac{1}{Y_{XS}} \cdot r_X, \quad r_N = -Y_{NX} \cdot r_X, \quad r_P = Y_{PX} \cdot r_X, \quad r_{CO_2} = Y_{CX} \cdot r_X$$

479 Similarly, the biomass-specific rates were calculated as  $q_S = \mu / Y_{XS}$ ,  $q_N = Y_{NX} \mu$ ,  $q_P = Y_{PX} \mu$  and  
480  $q_C = Y_{CX} \mu$ . The yields  $Y_{XS}$ ,  $Y_{CX}$  and max. specific growth rate  $\mu_{max}$  were determined by fitting the  
481 measurements from the 16h light / 8h dark experiment with this model. Additional estimations of  
482 the  $\mu_{max}$  based on batches and chemostat experiments under continuous illumination and light / dark  
483 patterns resulted in  $\mu_{max}$  values of  $0.14 \pm 0.05$ . The yields  $Y_{NX}$  and  $Y_{PX}$  (and consequently the N and  
484 P biomass composition  $nN$  and  $nP$ , respectively) were determined from the 8h light / 16h dark  
485 experiment, for which we were able to record better quality data.

486

487 The liquid flow rate  $F$  ( $\text{L h}^{-1}$ ) and volume  $V$  (L), the gas flow rate  $F_g$  ( $\text{L h}^{-1}$ ) and volume  $V_g$  (L), as  
488 well as the concentrations of chemical compounds in the influent  $C_{in}$  ( $\text{mmol L}^{-1}$ ) were all fixed in  
489 the experiments. The volumetric mass transfer coefficient  $k_{La}$  ( $\text{h}^{-1}$ ) was determined from the  
490 correlation with the power input, liquid volume, and gas velocity (see SI-1). The dissolved  $\text{CO}_2$   
491 concentration,  $C_c^*$  ( $\text{mmol L}^{-1}$ ), was calculated function of gas concentration  $C_{c,g}$ , Henry coefficient  
492  $H_C$  ( $\text{mol L}^{-1} \text{atm}^{-1}$ ) and respective temperature ( $20^\circ\text{C}$  in dark and  $30^\circ\text{C}$  in light) and pressure (1  
493 atm).

494

495 Two light sources with intensity  $I_0$  were placed at opposite sides next to the reactor. The light  
496 intensity decrease away from the reactor wall was assumed to follow the Beer-Lambert attenuation



497 law. Therefore, by summing the light intensities coming from both sides one obtains the total light  
498 intensity  $I_t$  at a radial position  $x$  (m) in the reactor:

$$499 \quad I_t = I_0 \cdot \left( e^{-\varepsilon \cdot c_X \cdot x} + e^{-\varepsilon \cdot c_X \cdot (2 \cdot R - x)} \right) \quad (5)$$

500 with  $R$  (m) the reactor radius,  $\varepsilon$  ( $\text{m}^2 \text{g}^{-1}$ ) the biomass-specific light attenuation coefficient and  $C_X$   
501 ( $\text{g m}^{-3}$ ) the biomass concentration. We considered that due to liquid mixing the cells will be exposed  
502 to an average light intensity  $I$  ( $\text{W m}^{-2}$ ) computed by integrating eq. (5) over the reactor diameter:

$$503 \quad I = I_0 \cdot \frac{1 - e^{-2 \cdot \varepsilon \cdot c_X \cdot R}}{\varepsilon \cdot c_X \cdot R} \quad (6)$$

504 The model was solved in MATLAB (R2018b, Mathworks, Natick, MA, [www.mathworks.com](http://www.mathworks.com))  
505 using a stiff solver for the ordinary differential equations system (2) and (3). The initial  
506 concentrations were taken to coincide with the measurements. The parameter estimation was  
507 performed by a constrained optimization routine minimizing the sum of squares of relative errors  
508 between model and experimental data. The fixed model parameters and the fitted parameters are  
509 listed in Table 1. A more extensive description of the parameter used is available in SI-1.

510

## 511 **Acknowledgements**

512 This study was financed by the tenure-track start-up grant of the Department of Biotechnology of  
513 the Faculty of Applied Sciences of the TU Delft (David Weissbrodt, PI). We acknowledge the  
514 Onassis Foundation for the financial support in the scholarship of Viktor Chasna. We also thank  
515 Dirk Geerts and Rob Kerste for technical assistance with the reactor infrastructure and fermentation  
516 facility, Katie Thorp for the isolation of the culture and Gijs Kuenen for the valuable discussions.

517

## 518 **Conflict of interest statement**

519 The authors declare no conflict of interest.

520

## 521 **Preprint**

522 This manuscript will be deposited as pre-print in bioRxiv.

523

## 524 **Supplementary information**

525 Appendix 1: Estimation of the  $k_{La}$  of the process

526 Appendixes 2: Mathematical model simulations

- 527 • Fig. A-1: Data and simulation of the 8 h light / 16 h dark cycles with extended light phase.
- 528 • Fig. A-2: Model results for the light intensity inside the reactor
- 529 • Fig. A-3: Model results for production and uptake rate in the 16 h light / 8 h dark cycles
- 530 • Fig. A-4: Model results for production and uptake rate in the 8 h light / 16 h dark cycles.

531

## 532 **References**

- 533 1. Blankenship R, Madigan M, Bauer C. Anoxygenic Photosynthetic Bacteria. Blankenship RE,  
534 Madigan MT, Bauer CE, editors. Dordrecht: Springer Netherlands; 1995. 595–626 p.  
535 (Advances in Photosynthesis and Respiration; vol. 2).
- 536 2. Alloul A, Wuyts S, Lebeer S, Vlaeminck SE. Volatile fatty acids impacting phototrophic  
537 growth kinetics of purple bacteria: Paving the way for protein production on fermented  
538 wastewater. *Water Res.* 2019;152:138–47.
- 539 3. Madigan MT, Jung DO. An Overview of Purple Bacteria: Systematics, Physiology, and  
540 Habitats. In: Hunter CN, Daldal F, Thurnauer MC, Beatty JT, editors. *The Purple  
541 Phototrophic Bacteria*. Dordrecht: Springer Netherlands; 2009. p. 1–15.
- 542 4. Hülsen T, Hsieh K, Lu Y, Tait S, Batstone DJ. Simultaneous treatment and single cell protein  
543 production from agri-industrial wastewaters using purple phototrophic bacteria or microalgae  
544 – A comparison. *Bioresour Technol.* 2018;254:214–23.
- 545 5. Wang H, Yang A, Zhang G, Ma B, Meng F, Peng M, et al. Enhancement of carotenoid and  
546 bacteriochlorophyll by high salinity stress in photosynthetic bacteria. *Int Biodeterior  
547 Biodegradation.* 2017;121:91–6.
- 548 6. Vincenzini M, Marchini A, Ena A, De Philippis R. H<sub>2</sub> and poly- $\beta$ -hydroxybutyrate, two  
549 alternative chemicals from purple non sulfur bacteria. *Biotechnol Lett.* 1997;19(8):759–62.
- 550 7. Hustede E, Steinbüchel A, Schlegel HG. Relationship between the photoproduction of  
551 hydrogen and the accumulation of PHB in non-sulphur purple bacteria. *Appl Microbiol  
552 Biotechnol.* 1993;39(1):87–93.
- 553 8. Madigan M, Cox JC, Gest H. Photopigments in *Rhodospseudomonas capsulata* cells grown  
554 anaerobically in darkness. *J Bacteriol.* 1982;150(3):1422–9.
- 555 9. Imhoff JF. Taxonomy and Physiology of Phototrophic Purple Bacteria and Green Sulfur  
556 Bacteria. In: Blankenship RE, Madigan MT, Bauer CE, editors. *Anoxygenic Photosynthetic*

- 557 Bacteria. Dordrecht: Springer Netherlands; 1995. p. 1–15.
- 558 10. Madigan MT, Bender K, Buckley D, Sattley M, Stahl D. Brock Biology of Microorganisms.  
559 Fourteen Edition. Vol. 1, Pearson. Pearson; 2015. 1–1041 p.
- 560 11. Green J, Paget MS. Bacterial redox sensors. *Nat Rev Microbiol.* 2004;2(12):954–66.
- 561 12. Laguna R, Tabita FR, Alber BE. Acetate-dependent photoheterotrophic growth and the  
562 differential requirement for the Calvin-Benson-Bassham reductive pentose phosphate cycle  
563 in *Rhodobacter sphaeroides* and *Rhodopseudomonas palustris*. *Arch Microbiol.*  
564 2011;193(2):151–4.
- 565 13. Dupuis A, Chevallet M, Darrouzet E, Duborjal H, Lunardi J, Issartel JP. The Complex I from  
566 *Rhodobacter capsulatus*. *Biochim Biophys Acta - Bioenerg.* 1998;1364(2):147–65.
- 567 14. Spero AM, Saheed I, Noguera DR, Donohue TJ. Cytochrome Complexes: Evolution,  
568 Structures, Energy Transduction, and Signaling. 2016;41:237–51.
- 569 15. McKinlay JB, Harwood CS. Calvin cycle flux, pathway constraints, and substrate oxidation  
570 state together determine the H<sub>2</sub> biofuel yield in photoheterotrophic bacteria. *MBio.*  
571 2011;2(2):e00323-10.
- 572 16. Gordon GC, McKinlay JB. Calvin cycle mutants of photoheterotrophic purple nonsulfur  
573 bacteria fail to grow due to an electron imbalance rather than toxic metabolite accumulation.  
574 *J Bacteriol.* 2014;196(6):1231-1237.
- 575 17. Kim JS, Ito K, Takahashi H. The Relationship between Nitrogenase Activity and Hydrogen  
576 Evolution in *Rhodopseudomonas palustris*. *Agric Biol Chem.* 1980;44(4):827–33.
- 577 18. Basak N, Jana AK, Das D, Saikia D. Photofermentative molecular biohydrogen production  
578 by purple-non-sulfur (PNS) bacteria in various modes: The present progress and future  
579 perspective. Vol. 39, *International Journal of Hydrogen Energy.* 2014. p. 6853–71.
- 580 19. Oda Y, Samanta SK, Federico †, Rey E, Wu L, Liu X, et al. Functional Genomic Analysis of  
581 Three Nitrogenase Isozymes in the Photosynthetic Bacterium *Rhodopseudomonas palustris*.  
582 *J Bacteriol.* 2005;187(22):7784–94.

- 583 20. McKinlay JB, Oda Y, Ruhl M, Posto AL, Sauer U, Harwood CS. Non-growing  
584 *Rhodopseudomonas palustris* increases the hydrogen gas yield from acetate by shifting from  
585 the glyoxylate shunt to the tricarboxylic acid cycle. J Biol Chem. 2014;
- 586 21. Willison JC, Jouanneau Y, Colbeau A, Vignais PM. H<sub>2</sub> metabolism in photosynthetic  
587 bacteria and relationship to N<sub>2</sub> fixation. Ann l'Institut Pasteur / Microbiol. 1983  
588 Jul;134(1):115–35.
- 589 22. Kutralam-Muniasamy G, Corona-Hernandez J, Narayanasamy RK, Marsch R, Pérez-Guevara  
590 F. Phylogenetic diversification and developmental implications of poly-(R)-3-  
591 hydroxyalkanoate gene cluster assembly in prokaryotes. FEMS Microbiol Lett.  
592 2017;364(13):1–9.
- 593 23. Montano-Herrera L, Laycock B, Werker A, Pratt S. The evolution of polymer composition  
594 during PHA accumulation: The significance of reducing equivalents. Bioengineering.  
595 2017;4(1):20.
- 596 24. Hustede E, Steinbüchel A, Schlegel HG. Cloning of poly(3-hydroxybutyric acid) synthase  
597 genes of *Rhodobacter sphaeroides* and *Rhodospirillum rubrum* and heterologous expression  
598 in *Alcaligenes eutrophus*. FEMS Microbiol Lett. 1992;93:285–91.
- 599 25. Haywood GW, Anderson AJ, Chu L, Dawes EA. The role of NADH- and NADPH-linked  
600 acetoacetyl-CoA reductases in the poly-3-hydroxybutyrate synthesizing organism  
601 *Alcaligenes eutrophus*. FEMS Microbiol Lett. 1988;52(3):259–64.
- 602 26. De Philippis R, Ena A, Guastiini M, Sili C, Vincenzini M. Factors affecting poly-β-  
603 hydroxybutyrate accumulation in cyanobacteria and in purple non-sulfur bacteria. FEMS  
604 Microbiol Lett. 1992;103(2–4):187–94.
- 605 27. Higuchi-Takeuchi M, Morisaki K, Toyooka K, Numata K. Synthesis of high-molecular-  
606 weight polyhydroxyalkanoates by marine photosynthetic purple bacteria. PLoS One.  
607 2016;11(8): e0160981.
- 608 28. Bardone E, Bravi M, Keshavarz T, Padovani G, Carlozzi P, Seggiani M, et al. PHB-Rich

- 609 Biomass and BioH<sub>2</sub> Production by Means of Photosynthetic Microorganisms. Chem Eng  
610 Trans. 2016;49.
- 611 29. Hustede E, Steinbüchel A, Schlegel HG. Relationship between the photoproduction of  
612 hydrogen and the accumulation of PHB in non-sulphur purple bacteria. Appl Microbiol  
613 Biotechnol. 1993;39:87–93.
- 614 30. Cerruti M, Stevens B, Ebrahimi S, Alloul A, Vlaeminck SE, Weissbrodt DG. Enriching and  
615 aggregating purple non-sulfur bacteria in an anaerobic sequencing-batch photobioreactor for  
616 nutrient capture from wastewater. bioRxiv 2020;2020.01.08.899062.
- 617 31. Wang Y, Qian P-Y. Conservative Fragments in Bacterial 16S rRNA Genes and Primer  
618 Design for 16S Ribosomal DNA Amplicons in Metagenomic Studies. PLoS One.  
619 2009;4(10):7401.
- 620 32. Altschul SF, Gish W, Miller W, Myers EW, Lipman DJ. Basic local alignment search tool. J  
621 Mol Biol. 1990;215(3):403–10.
- 622 33. Lip KYF, García-Ríos E, Costa CE, Guillamón JM, Domingues L, Teixeira J, et al. Selection  
623 and subsequent physiological characterisation of industrial *Saccharomyces cerevisiae* strains  
624 during continuous growth at sub- and supra optimal temperatures. bioRxiv.  
625 2020;2020.01.30.926709
- 626 34. Zuriani R, Vigneswari S, Azizan MNM, Majid MIA, Amirul AA. A high throughput Nile red  
627 fluorescence method for rapid quantification of intracellular bacterial  
628 polyhydroxyalkanoates. Biotechnol Bioprocess Eng. 2013;18(3):472–8.
- 629 35. McKinlay JB, Harwood CS. Carbon dioxide fixation as a central redox cofactor recycling  
630 mechanism in bacteria. Proc Natl Acad Sci. 2010;107(26):11669–75.
- 631 36. Kaewsuk J, Thorasampan W, Thanuttamavong M, Seo GT. Kinetic development and  
632 evaluation of membrane sequencing batch reactor (MSBR) with mixed cultures  
633 photosynthetic bacteria for dairy wastewater treatment. J Environ Manage. 2010;91(5):1161–  
634 8.

- 635 37. Wolf G, Picioreanu C, van Loosdrecht MCM. Kinetic Modeling of Phototrophic Biofilms:  
636 The PHOBIA Model. *Biotechnol Bioeng.* 2007;97:1064–79.
- 637 38. Puyol D, Barry EM, Hülsen T, Batstone DJ. A mechanistic model for anaerobic phototrophs  
638 in domestic wastewater applications: Photo-anaerobic model (PANM). *Water Res.* 2017;116:  
639 241-253.
- 640 39. Prachanurak P, Chiemchaisri C, Chiemchaisri W, Yamamoto K. Modelling of biofilm  
641 growth for photosynthetic biomass production in a pipe-overflow recirculation bioreactor.  
642 *Biochem Eng J.* 2019;142:50–7.
- 643 40. Sander R. Compilation of Henry’s law constants (version 4.0) for water as solvent. *Atmos*  
644 *Chem Phys.* 2015;15(8):4399–981.
- 645 41. Oehmen A, Zeng RJ, Saunders AM, Blackall LL, Keller J, Yuan Z. Anaerobic and aerobic  
646 metabolism of glycogen-accumulating organisms selected with propionate as the sole carbon  
647 source. *Microbiology.* 2006;152(9):2767–78.
- 648 42. Montiel Corona V, Le Borgne S, Revah S, Morales M. Effect of light-dark cycles on  
649 hydrogen and poly- $\beta$ -hydroxybutyrate production by a photoheterotrophic culture and  
650 *Rhodobacter capsulatus* using a dark fermentation effluent as substrate. *Bioresour Technol.*  
651 2017;226:238–46.
- 652 43. Zhi R, Yang A, Zhang G, Zhu Y, Meng F, Li X. Effects of light-dark cycles on  
653 photosynthetic bacteria wastewater treatment and valuable substances production. *Bioresour*  
654 *Technol.* 2019;274:496–501.
- 655 44. Koku H, Eroglu I, Gündüz U, Yücel M, Türker L. Kinetics of biological hydrogen  
656 production by the photosynthetic bacterium *Rhodobacter sphaeroides* O.U. 001. *Int J*  
657 *Hydrogen Energy.* 2003;28(4):381–8.
- 658 45. Li X, Wang Y, Zhang S, Chu J, Zhang M, Huang M, et al. Effects of light/dark cycle, mixing  
659 pattern and partial pressure of H<sub>2</sub> on biohydrogen production by *Rhodobacter sphaeroides*  
660 ZX-5. *Bioresour Technol.* 2011;102(2):1142–8.

- 661 46. Wakayama T, Nakada E, Asada Y, Miyake J. Effect of light/dark cycle on bacterial hydrogen  
662 production by *Rhodobacter sphaeroides* RV: From hour to second range. *Appl Biochem*  
663 *Biotechnol - Part A Enzym Eng Biotechnol*. 2000;84–86:431–40.
- 664 47. Brotosudarmo THP, Collins AM, Gall A, Roszak AW, Gardiner AT, Blankenship RE, et al.  
665 The light intensity under which cells are grown controls the type of peripheral light-  
666 harvesting complexes that are assembled in a purple photosynthetic bacterium. *Biochem J*.  
667 2011;440(1):51–61.
- 668 48. Imam S, Fitzgerald CM, Cook EM, Donohue TJ, Noguera DR. Quantifying the effects of  
669 light intensity on bioproduction and maintenance energy during photosynthetic growth of  
670 *Rhodobacter sphaeroides*. *Photosynth Res*. 2015;123(2):167–82.
- 671 49. Van Aalst-Van Leeuwen MA, Pot MA, Van Loosdrecht MCM, Heijnen JJ. Kinetic modeling  
672 of poly( $\beta$ -hydroxybutyrate) production and consumption by *Paracoccus pantotrophus* under  
673 dynamic substrate supply. *Biotechnol Bioeng*. 1997;55(5):773–82.
- 674 50. van Loosdrecht MCM, Pot MA, Heijnen JJ. Importance of bacterial storage polymers in  
675 bioprocesses. *Water Sci Technol*. 1997;35(1):41–7.
- 676 51. Narancic T, Scollica E, Kenny ST, Gibbons H, Carr E, Brennan L, et al. Understanding the  
677 physiological roles of polyhydroxybutyrate (PHB) in *Rhodospirillum rubrum* S1 under  
678 aerobic chemoheterotrophic conditions. *Appl Microbiol Biotechnol*. 2016;100(20):8901–12.
- 679 52. Braunegg G, Lefebvre G, Genser KF. Polyhydroxyalkanoates, biopolyesters from renewable  
680 resources: Physiological and engineering aspects. *J Biotechnol*. 1998;65(2–3):127–61.
- 681 53. McKinlay JB, Oda Y, Ruhl M, Posto AL, Sauer U, Harwood CS. Non-growing  
682 *Rhodopseudomonas palustris* increases the hydrogen gas yield from acetate by shifting from  
683 the glyoxylate shunt to the tricarboxylic acid cycle. *J Biol Chem*. 2014 Jan 24;289(4):1960–  
684 70.
- 685 54. Satoh Y, Tajima K, Tannai H, Munekata M. Enzyme-catalyzed poly(3-hydroxybutyrate)  
686 synthesis from acetate with CoA recycling and NADPH regeneration in vitro. *J Biosci*



- 687 Bioeng. 2003;95(4):335–41.
- 688 55. Kanno N, Matsuura K, Haruta S. Different Metabolomic Responses to Carbon Starvation  
689 between Light and Dark Conditions in the Purple Photosynthetic Bacterium,  
690 *Rhodopseudomonas palustris*; Microbes Environ. 2018;33(1):83–8.
- 691 56. Kranz RG, Gabbert KK, Locke TA, Madigan MT. Polyhydroxyalkanoate production in  
692 *Rhodobacter capsulatus*: Genes, mutants, expression, and physiology. Appl Environ  
693 Microbiol. 1997;63(8):3003–9.
- 694 57. Krishna C, Van Loosdrecht MCM. Effect of temperature on storage polymers and  
695 settleability of activated sludge. Water Res. 1999;33(10):2374–82.
- 696 58. Koku H, Eroglu I, Gündüz U, Yücel M, Türker L. Aspects of the metabolism of hydrogen  
697 production by *Rhodobacter sphaeroides*. Int J Hydrogen Energy. 2002;27(11–12):1315–29.
- 698 59. Adessi A, Torzillo G, Baccetti E, De Philippis R. Sustained outdoor H<sub>2</sub> production with  
699 *Rhodopseudomonas palustris* cultures in a 50 L tubular photobioreactor. Int J Hydrogen  
700 Energy. 2012;37:8840–9.
- 701 60. van't Riet K, Tramper J. Basic Bioreactor Design. CRC Press; 1991.
- 702 61. Liu K, Phillips JR, Sun X, Mohammad S, Huhnke RL, Atiyeh HK. Investigation and  
703 Modeling of Gas-Liquid Mass Transfer in a Sparged and Non-Sparged Continuous Stirred  
704 Tank Reactor with Potential Application in Syngas Fermentation. Fermentation.  
705 2019;5(3):75.
- 706 62. Okubo A. Diffusion: Mass Transfer in Fluid Systems. E. L. Cussler . Q Rev Biol.  
707 1987;62(1):131–131.

708

## 709 **Figure legends**

710 **Figure 1.** Schematic representation of the reducing power allocation in *Rhodopseudomonas*. Red  
711 lines: electron flow; Black dashed lines: proton transfer; Blue dotted lines: NADH is normally  
712 produced in the catabolic processes, whereas NADPH is used in the anabolic processes, such as  
713 PHAs formation. Biomass and CBB are the primary electron sinks in PNSB. PHAs and H<sub>2</sub> are two  
714 of the other possible electron sinks.

715 **Figure 2.** Dynamics of biomass, acetate, ammonium and phosphate concentrations during light-  
716 dark cycles: (A),(C) 16 h light / 8 h dark; (B),(D) 8 h light / 16 h dark. Gray areas represent the  
717 dark periods. (A),(B) biomass (black circles) and acetate (red open squares) measured  
718 concentrations, with lines being the model results. The biomass concentration achieved a stationary  
719 state, while acetate reached very low (limiting) concentrations after 2 h of the 16 h light periods.  
720 The biomass increased without reaching a steady state during the 8 h light periods, while acetate  
721 was not fully consumed. (C),(D) ammonium (blue diamonds) and phosphate (green triangles)  
722 measured concentrations, with lines being the model results. Concentrations of N and P were not  
723 limiting for the system in any illumination phase.

724 **Figure 3.** Dynamics of CO<sub>2</sub>, H<sub>2</sub> and PHA during light-dark cycles: (A),(D) continuous illumination;  
725 (B),(E),(G) 16 h light / 8 h dark; (C),(F),(H) 8 h light / 16 h dark. Gray areas represent the dark  
726 periods. (A),(B),(C) CO<sub>2</sub> production rate - measured (red circles) and computed (lines). CO<sub>2</sub>  
727 production was constant during continuous illumination, but peaks appeared during light-dark  
728 cycles, correlated with the acetate uptake. (D),(E),(F) measured H<sub>2</sub> production (blue circles).  
729 Constant low level H<sub>2</sub> was produced during continuous illumination and 16 h light cycles, but H<sub>2</sub>  
730 production strongly increased in each light period of the 8 h light cycles. (G),(H) PHAs fluorescent  
731 counts per gram biomass in the light/dark experiments. A PHAs peak was measured at the  
732 beginning of each light phase under the 16 h light conditions, however less clear pattern could be  
733 detected under the 8 h light experiments.

734 **Tables**

735 **Table 1.** Model parameters. The maximum biomass-specific growth rate and yields were fitted to experimental data,  
736 while the other parameters were measured during experiments, calculated or obtained from literature.

| Parameter name                                                | Symbol        | Value                            | Units                                                                 | Source                      |
|---------------------------------------------------------------|---------------|----------------------------------|-----------------------------------------------------------------------|-----------------------------|
| <b>Max. biomass-specific growth rate</b>                      | $\mu_{\max}$  | 0.15                             | $\text{C-mol X} \cdot \text{h}^{-1} \cdot \text{C-mol}^{-1} \text{X}$ | Fitted                      |
| <b>Biomass yield</b>                                          | $Y_{XS}$      | 0.88                             | $\text{C-mol X} \cdot \text{C-mol}^{-1} \text{S}$                     | Fitted                      |
| <b>Ammonium yield</b>                                         | $Y_{NX}$      | 0.18                             | $\text{mol} \cdot \text{C-mol}^{-1} \text{X}$                         | Fitted                      |
| <b>Phosphate yield</b>                                        | $Y_{PX}$      | 0.009                            | $\text{mol} \cdot \text{C-mol}^{-1} \text{X}$                         | Fitted                      |
| <b>CO<sub>2</sub> yield</b>                                   | $Y_{CX}$      | 0.142                            | $\text{mol} \cdot \text{C-mol}^{-1} \text{X}$                         | Fitted                      |
| <b>Reactor radius</b>                                         | $R$           | 0.055                            | m                                                                     | Measured                    |
| <b>Liquid volume</b>                                          | $V$           | 1.2                              | L                                                                     | Measured                    |
| <b>Liquid flow rate</b>                                       | $F$           | 0.048                            | $\text{L} \cdot \text{h}^{-1}$                                        | Measured                    |
| <b>Dilution rate</b>                                          | $D$           | 0.04                             | $\text{h}^{-1}$                                                       | $F/V$                       |
| <b>Gas volume</b>                                             | $V_g$         | 0.3                              | L                                                                     | Measured                    |
| <b>Gas flow rate</b>                                          | $F_g$         | 7.14                             | $\text{L} \cdot \text{h}^{-1}$                                        | Measured                    |
| <b>Inflow acetate concentration</b>                           | $C_{S,in}$    | 7                                | mM                                                                    | Measured                    |
| <b>Inflow ammonium concentration</b>                          | $C_{N,in}$    | 4.28                             | mM                                                                    | Measured                    |
| <b>Inflow phosphate concentration</b>                         | $C_{P,in}$    | 0.22                             | mM                                                                    | Measured                    |
| <b>Light intensity at reactor walls</b>                       | $I_0$         | 300                              | $\text{W} \cdot \text{m}^{-2}$                                        | Measured                    |
| <b>Light extinction coefficient per biomass concentration</b> | $\varepsilon$ | 0.1                              | $\text{m}^2 \cdot \text{g}^{-1}$                                      | (17)                        |
| <b>Half-saturation coefficient acetate</b>                    | $K_S$         | 0.1                              | mM                                                                    | Lower than in (36) (0.3 mM) |
| <b>Half-saturation coefficient ammonium</b>                   | $K_N$         | 0.001                            | mM                                                                    | (37)                        |
| <b>Half-saturation coefficient phosphate</b>                  | $K_P$         | 0.003                            | mM                                                                    | (38)                        |
| <b>Half-saturation coefficient light</b>                      | $K_I$         | 10                               | $\text{W} \cdot \text{m}^{-2}$                                        | (39)                        |
| <b>CO<sub>2</sub> mass transfer coefficient</b>               | $k_{La}$      | 32                               | $\text{h}^{-1}$                                                       | Calculated (SI-1)           |
| <b>Henry coefficient CO<sub>2</sub></b>                       | $H_C$         | 0.03 (at 30°C)<br>0.04 (at 20°C) | $\text{mol} \cdot \text{L}^{-1} \cdot \text{atm}^{-1}$                | (40)                        |

737

738

739 **Table 2.** Distribution of the carbon sources and carbon balances in different illumination conditions

| Light/dark regimes | Carbon inputs<br>(C-mmol h <sup>-1</sup> ) |                     | Carbon outputs<br>(C-mmol h <sup>-1</sup> ) |                            |           | Carbon balance<br>(% C) | Electron balance<br>(% COD) |
|--------------------|--------------------------------------------|---------------------|---------------------------------------------|----------------------------|-----------|-------------------------|-----------------------------|
|                    | Acetate<br>Influent                        | Acetate<br>Effluent | Biomass<br>Effluent                         | CO <sub>2</sub><br>Off-gas | Σ out     |                         |                             |
| Component          |                                            |                     |                                             |                            |           |                         |                             |
| Phase              |                                            |                     |                                             |                            |           |                         |                             |
| 24 h light         | 0.66±0.05                                  | <LOD <sup>a</sup>   | 0.58                                        | 0.07±0.001                 | 0.65      | 98%                     | 98%                         |
| 16 h light         | 0.66±0.05                                  | 0.11±0.01           | 0.57±0.01                                   | 0.08±0.01                  | 0.75±0.01 | 115±2%                  | 113±1%                      |
| 8 h dark           |                                            | 0.10±0.02           | 0.51±0.03                                   | 0.07±0.02                  | 0.68±0.06 | 103±9%                  | 102±9%                      |
| 8 h light          | 0.61±0.006                                 | 0.28±0.03           | 0.62±0.05                                   | 0.07±0.01                  | 0.97±0.05 | 158±8% <sup>b</sup>     | 159±9% <sup>b</sup>         |
| 16 h dark          |                                            | 0.19±0.07           | 0.57±0.12                                   | 0.03±0.002                 | 0.79±0.15 | 130±25% <sup>b</sup>    | 137±27% <sup>b</sup>        |

740 <sup>a</sup> limit of detection; <sup>b</sup> the overvaluation of the carbon and electron balance can be due to an overestimation of the biomass concentration. The

741 absorbance measures taken might have influenced by the presence of PHAs inside the cells.

742

## 743 **Supplementary information**

744

### 745 **Appendix 1: Estimation of the $kLa$ 's of the process**

746 The overall mass transfer coefficients of the process were found in the  $CO_2$  and  $O_2$  mass  
747 balances. The calculation of the oxygen mass transfer coefficient was performed considering  
748 the equation for salt solutions

$$749 \quad kLa \text{ (s}^{-1}\text{)} = 0.002 \cdot \left( \frac{P}{V_{liquid}} \right)^{0.7} \cdot u_{gas}^{0.4}$$

750

751 where  $P$  is the power input (W),  $u_{gas}$  is the superficial gas velocity (m/s) and  $V_{liquid}$  the liquid  
752 volume (m<sup>3</sup>). The power input was calculated through the following equation (60)

753

$$754 \quad P(W) = \rho \cdot N_p \cdot N_i^3 \cdot D_i^5$$

755

756 where  $\rho$  is the density (kg m<sup>-3</sup>) of the solution,  $N_p$  is the impeller power number,  $N_i$  is the  
757 impeller rotating speed (s<sup>-1</sup>) and  $D_i$  is the impeller diameter (m).

758 The power number of the impeller is a function of the impeller type and the Reynolds number  
759 of the impeller. Reynolds was calculated through the following equation

760

$$761 \quad Re = \frac{\rho N_i D_i^2}{\mu}$$

762 where  $\mu$  is the viscosity of the solvent (Pa·s). Considering the density (997 kg m<sup>-3</sup>) and viscosity of  
763 water in 25 °C (0.00089 Pa·s) the Reynolds impeller was slightly higher than 10<sup>5</sup>. For that Reynolds  
764 and for a 6-blade Rushton turbine impeller the power number is around 5~6 (60). For the  
765 calculations, a power number of 6 was assumed. The diameter of the impeller was around 4 cm and  
766 the rotating speed 350 rpm (5.83 s<sup>-1</sup>). Using those values the power input of the impeller was found  
767 equal to 0.101 W.

768 The superficial gas velocity was calculated by dividing the gas flowrate ( $7.14 \text{ L h}^{-1}$ ) with the surface  
769 area ( $\pi R^2$ ). The reactor radius  $R$  was 5.5 cm. After dividing and correcting for the units the  
770 calculated superficial gas velocity was  $0.000209 \text{ m s}^{-1}$ . Using the calculated values of the superficial  
771 gas velocity, power input and liquid volume ( $1.2 \cdot 10^{-3} \text{ m}^3$ ) the  $k_{La}$  of oxygen was found equal to  
772  $33.52 \text{ (h}^{-1}\text{)}$ .

773 The  $k_{La}$  of carbon dioxide was found equal to  $32 \text{ (h}^{-1}\text{)}$  through the following equation (61). The  
774 diffusion coefficient used are  $1.92 \cdot 10^{-5} \text{ cm}^2 \text{ s}^{-1}$  (62)

775

776

$$kLa_x = \frac{kLa_{CO_2}}{\sqrt{\frac{D_{CO_2}}{D_x}}}$$

777

778 **Appendixes 2 to 5: Mathematical model simulations**

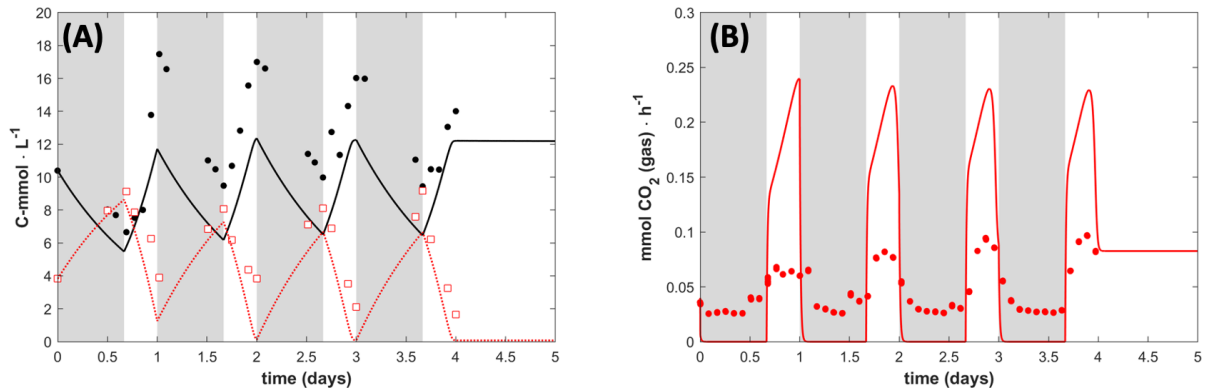

779

780 **Figure A-2.** Data and simulation with an additional extended light phase after the 8 h light 16 h dark cycles. (A)  
781 Biomass (black circles) and acetate (red open squares) measured concentrations, with lines being the model results. (B)  
782 Measured (red circles) and model prediction (line) of the  $\text{CO}_2$  production rate. A steady state is reached once the  
783 concentration of acetate is at its minimum.

784

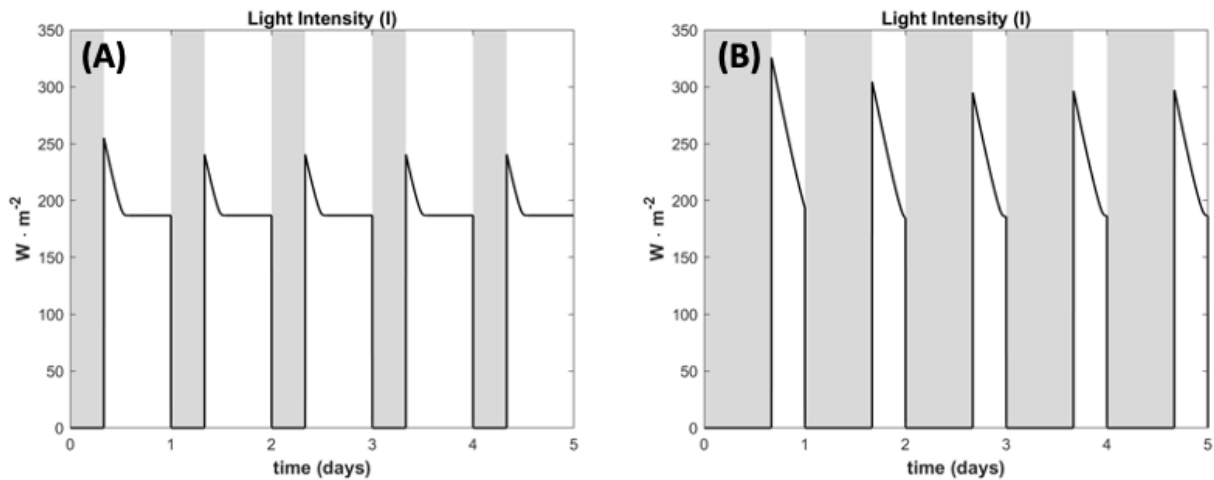

785

786 **Figure A-3.** Model results for the light intensity inside the reactor. (A) 16 h light / 8 h dark cycles. (B) 8 h light / 16 h  
787 dark cycles. Under any given condition light became a limiting factor.

788

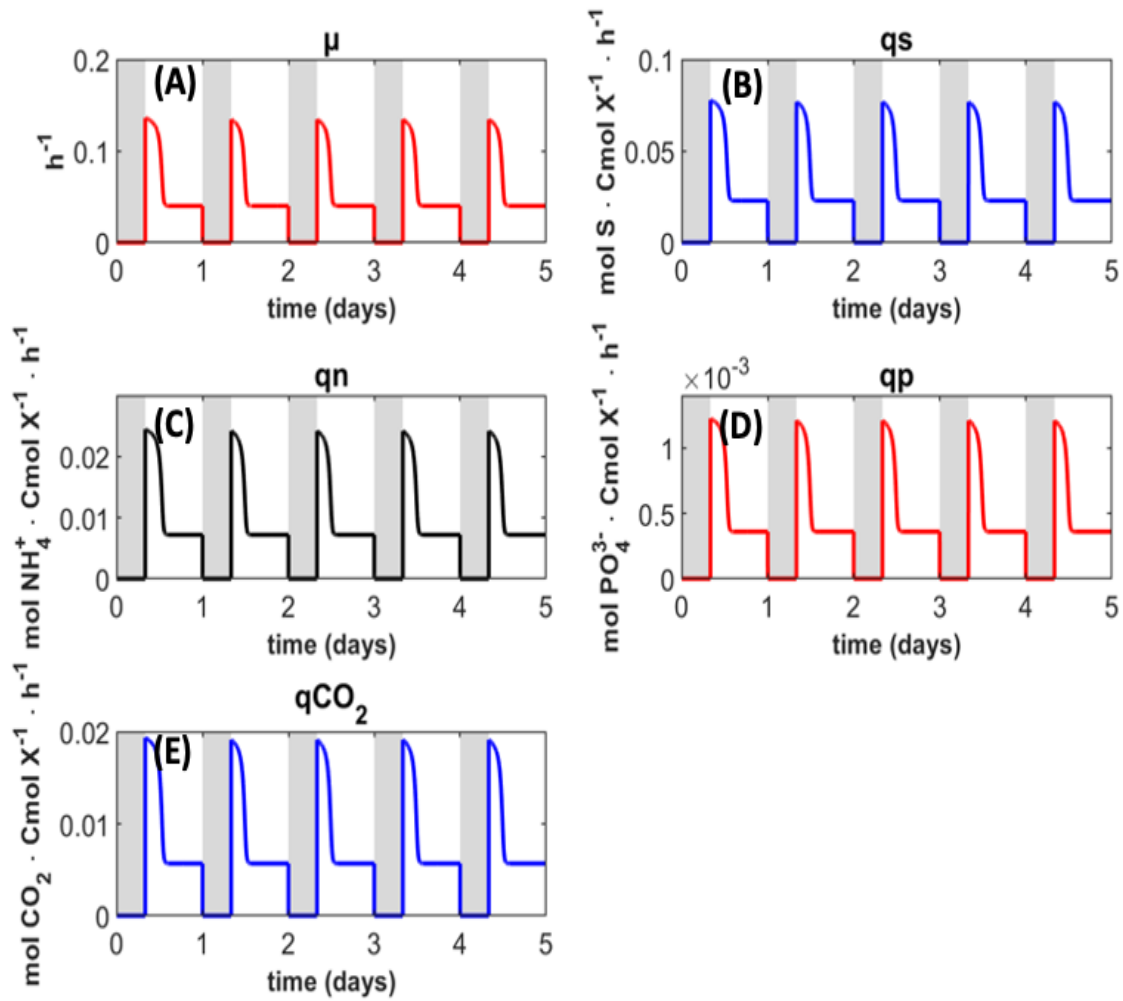

789

790 **Figure A-4.** Model results for production and uptake rate in the 16 h light / 8 h dark cycles. (A) specific growth rate. (B)  
791 specific acetate uptake rate. (C) specific ammonium uptake rate. (D) specific phosphate uptake rate. (E) specific  $\text{CO}_2$   
792 production rate.

793



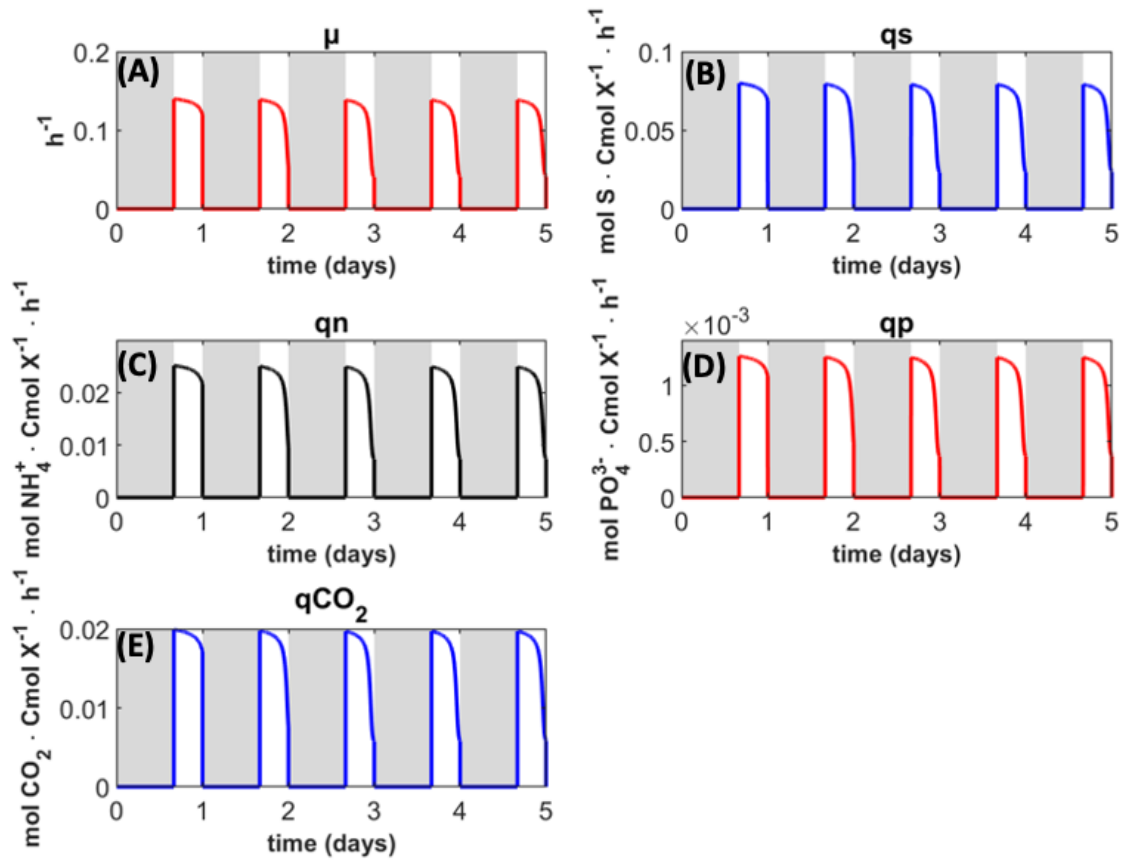

794

795 **Figure A-5.** Model results for production and uptake rate in the 8 h light / 16 h dark cycles. (A) specific growth rate. (B)

796 specific acetate uptake rate. (C) specific ammonium uptake rate. (D) specific phosphate uptake rate. (E) specific  $\text{CO}_2$

797 production rate.

798

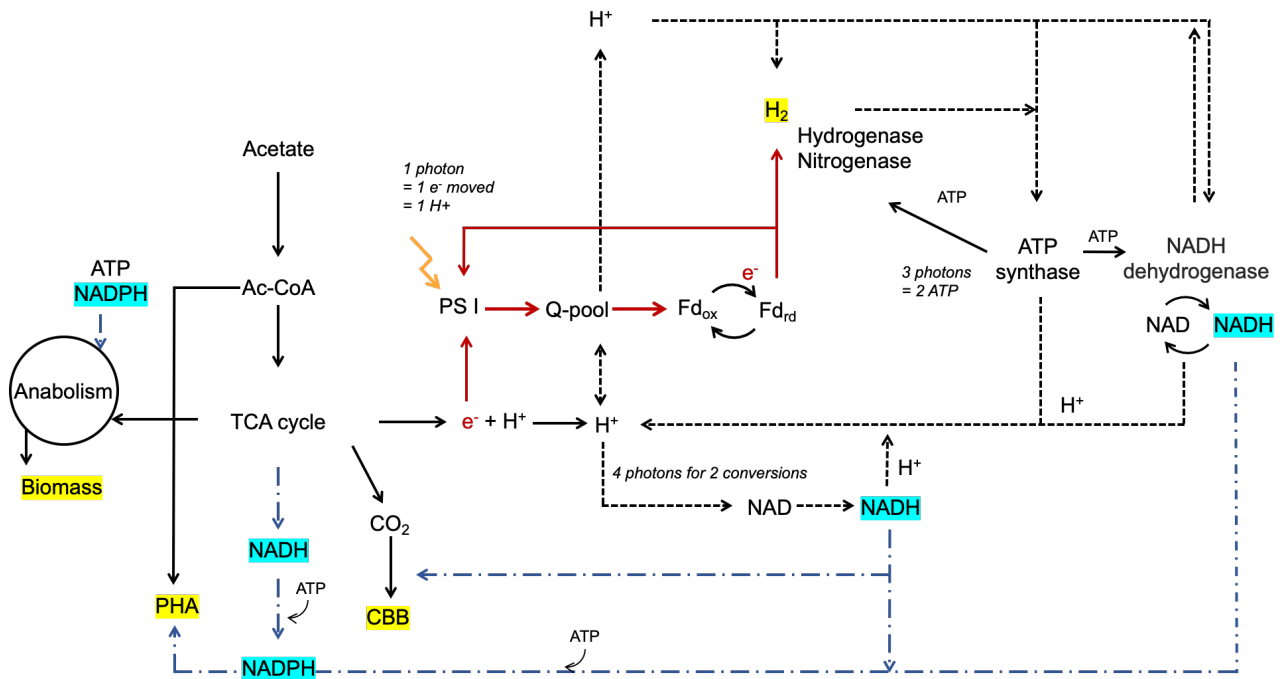

**Figure 1.** Schematic representation of the reducing power allocation in *Rhodospseudomonas*. Red lines: electron flow; Black dashed lines: proton transfer; Blue dotted lines: NADH is normally produced in the catabolic processes, whereas NADPH is used in the anabolic processes, such as PHAs formation. Biomass and CBB are the primary electron sinks in PNSB. PHAs and H<sub>2</sub> are two of the other possible electron sinks.

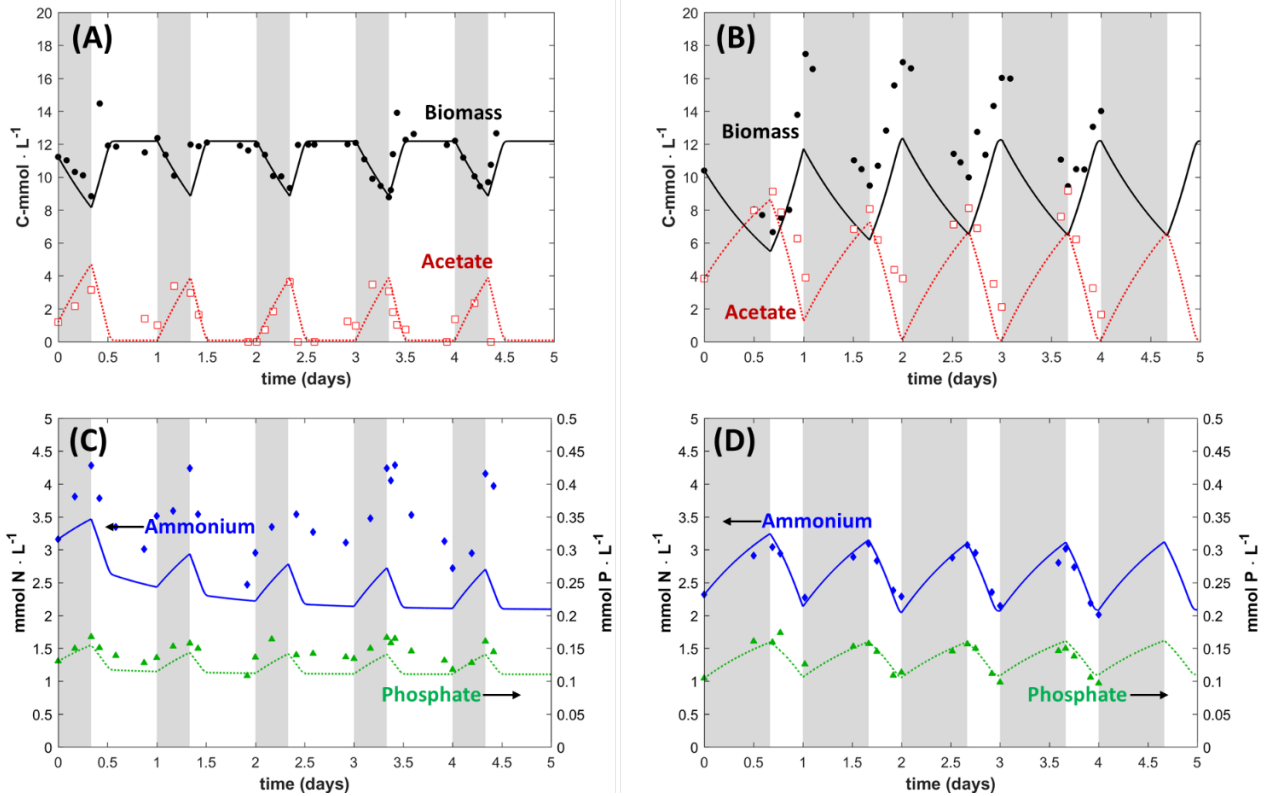

**Figure 2.** Dynamics of biomass, acetate, ammonium and phosphate concentrations during light-dark cycles: (A),(C) 16 h light / 8 h dark; (B),(D) 8 h light / 16 h dark. Gray areas represent the dark periods. (A),(B) biomass (black circles) and acetate (red open squares) measured concentrations, with lines being the model results. The biomass concentration achieved a stationary state, while acetate reached very low (limiting) concentrations after 2 h of the 16 h light periods. The biomass increased without reaching a steady state during the 8 h light periods, while acetate was not fully consumed. (C),(D) ammonium (blue diamonds) and phosphate (green triangles) measured concentrations, with lines being the model results. Concentrations of N and P were not limiting for the system in any illumination phase.

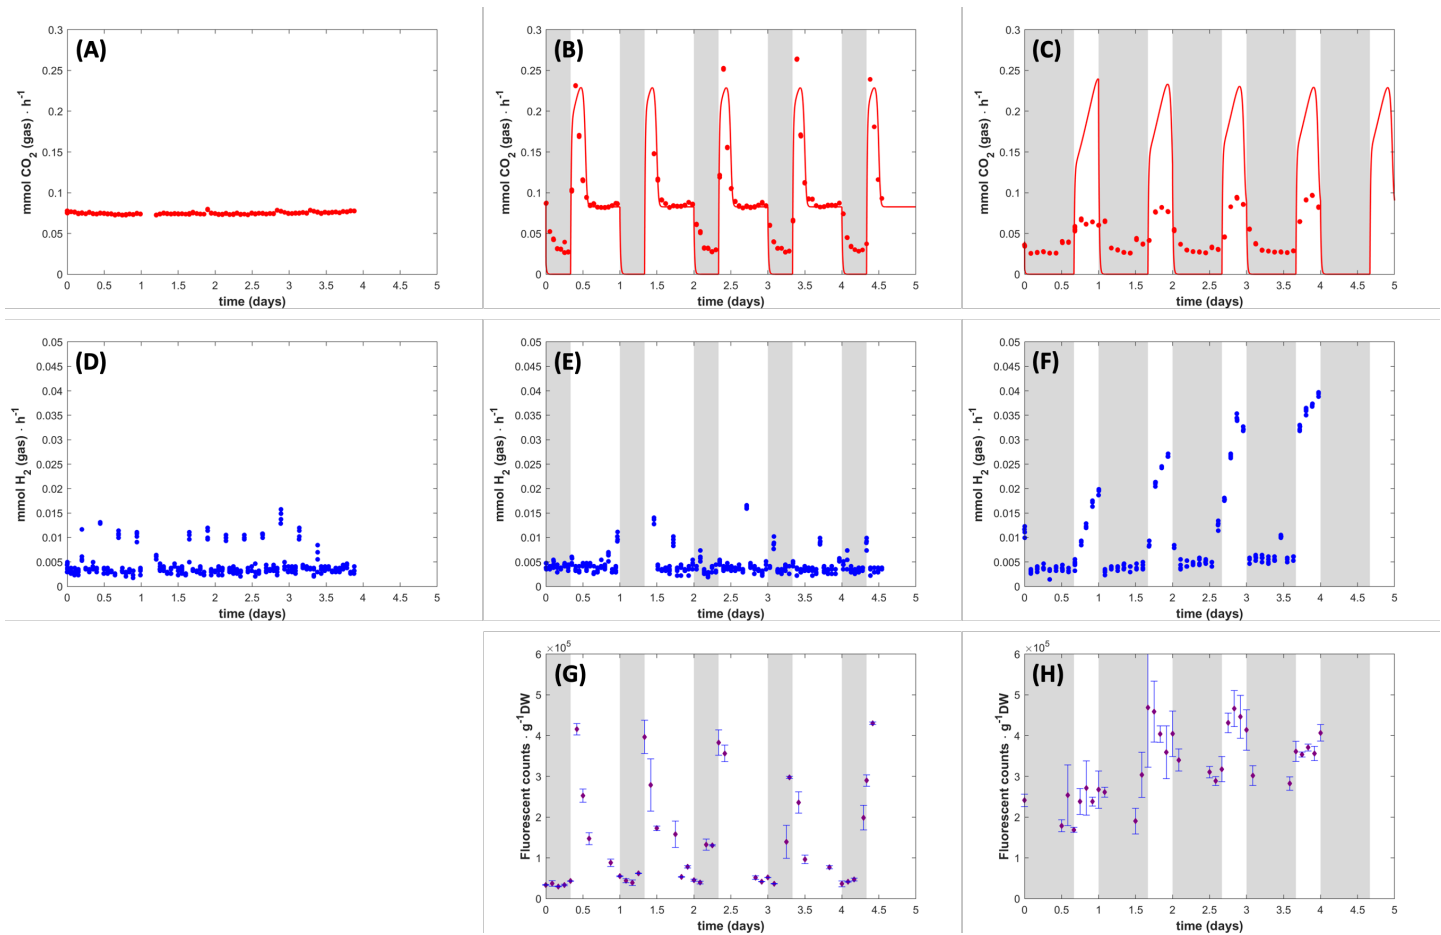

**Figure 3.** Dynamics of CO<sub>2</sub>, H<sub>2</sub> and PHA during light-dark cycles: (A),(D) continuous illumination; (B),(E),(G) 16 h light / 8 h dark; (C),(F),(H) 8 h light / 16 h dark. Gray areas represent the dark periods. (A),(B),(C) CO<sub>2</sub> production rate - measured (red circles) and computed (lines). CO<sub>2</sub> production was constant during continuous illumination, but peaks appeared during light-dark cycles, correlated with the acetate uptake. (D),(E),(F) measured H<sub>2</sub> production (blue circles). Constant low level H<sub>2</sub> was produced during continuous illumination and 16 h light cycles, but H<sub>2</sub> production strongly increased in each light period of the 8 h light cycles. (G),(H) PHAs fluorescent counts per gram biomass in the light/dark experiments. A PHAs peak was measured at the beginning of each light phase under the 16 h light conditions, however less clear pattern could be detected under the 8 h light experiments.
